# Supplementary material for: XRCC3 and XPD/ERCC2 Single Nucleotide Polymorphisms and the Risk of Cancer: A HuGE Review
Source: Oxford University Press journal article supplement (doi:10.1093/aje/kwj189), 2006-05-17
Supplement: kwj189_Supplementary_Data.zip [file kwj189_Supplementary_Data.zip]

# ***XRCC3* and *XPB/ERCC2* single nucleotide polymorphisms and the risk of cancer: A HuGE review**

## **Web Material**

### **References to the tables in alphabetical order**

Allan JM, Smith AG, Wheatley K, et al. Genetic variation in *XPB* predicts treatment outcome and risk of acute myeloid leukemia following chemotherapy. *Blood* 2004;104(13):3872-7

Benhamou S, Tuimala J, Bouchardy C, et al. DNA repair gene *XRCC2* and *XRCC3* polymorphisms and susceptibility to cancers of the upper aerodigestive tract. *Int J Cancer* 2004;112(5):901-4.

Bertram CG, Gaut RM, Barrett JH, et al. An assessment of a variant of the DNA repair gene *XRCC3* as a possible nevus or melanoma susceptibility genotype. *J Invest Dermatol* 2004;122(2):429-32.

Brewster AM, Alberg AJ, Strickland PT, et al. *XPB* polymorphism and risk of subsequent cancer in individuals with nonmelanoma skin cancer. *Cancer Epidemiol Biomarkers Prev* 2004;13(8):1271-5.

Butkiewicz D, Rusin M, Enewold L, et al. Molecular epidemiology and cancer prevention ? Genetic polymorphisms in DNA repair genes and risk of lung cancer. *Carcinogenesis* 2001; 22: 593-597

Caggana M, Kilgallen J, Conroy JM, et al. Associations between *ERCC2* polymorphisms and gliomas. *Cancer Epidemiol Biomarkers Prev* 2001;10:355-60.

Chen S, Tang D, Xue K, et al. DNA repair gene *XRCC1* and *XPB* polymorphisms and risk of lung cancer in a Chinese population. *Carcinogenesis* 2002 Aug;23(8):1321-5.

David-Beabes GL, Lunn RM, London SJ. No association between the *XPB* (Lys751Gln) polymorphism or the *XRCC3* (Thr241Met) polymorphism and lung cancer risk. *Cancer Epidemiol Biomarkers Prev* 2001;10(8):911-2.

Duan Z, Shen H, Lee JE, et al. DNA repair gene *XRCC3* 241Met variant is not associated with risk of cutaneous malignant melanoma. *Cancer Epidemiol Biomarkers Prev*. 2002;11(10 Pt 1):1142-3.

Dybdahl M, Vogel U, Frentz G, et al. Polymorphisms in the DNA repair gene *XPB*: correlations with risk and age at onset of basal cell carcinoma. *Cancer Epidemiol Biomarkers Prev* 1999;8:77-81

Figueiredo JC, Knight JA, Briollais L, et al. Polymorphisms *XRCC1*-R399Q and *XRCC3*-T241M and the risk of breast cancer at the Ontario site of the Breast Cancer Family Registry. *Cancer Epidemiol Biomarkers Prev* 2004;13(4):583-91

Gao WM, Romkes M, Day RD, et al. Association of the DNA repair gene *XPB* Asp312Asn polymorphism with p53 gene mutations in tobacco-related non-small cell lung cancer. *Carcinogenesis*. 2003;24(10):1671-6.

Han J, Hankinson SE, Ranu H, et al. Polymorphisms in DNA double-strand break repair genes and breast cancer risk in the Nurses' Health Study. *Carcinogenesis* 2004a;25(2):189-95.

Han J, Colditz GA, Samson LD, et al. Polymorphisms in DNA double-strand break repair genes and skin cancer risk. *Cancer Res* 2004b;64(9):3009-13.

Han J, Hankinson SE, Hunter DJ, et al. Genetic variations in *XRCC2* and *XRCC3* are not associated with endometrial cancer risk. *Cancer Epidemiol Biomarkers Prev* 2004c;13(2):330-1.

Harms C, Salama SA, Sierra-Torres CH, et al. Polymorphisms in DNA repair genes, chromosome aberrations, and lung cancer. *Environ Mol Mutagen* 2004;44(1):74-82.

Hou SM, Falt S, Angelini S, et al. The *XPB* variant alleles are associated with increased aromatic DNA adduct level and lung cancer risk. *Carcinogenesis* 2002;23(4):599-603.

Jacobsen NR, Nexø BA, Olsen A, et al. No association between the DNA repair gene *XRCC3* T241M polymorphism and risk of skin cancer and breast cancer. *Cancer Epidemiol Biomarkers Prev* 2003;12(6):584-5.

Jacobsen NR, Raaschou-Nielsen O, Nexø B, et al. *XRCC3* polymorphisms and risk of lung cancer. *Cancer Lett*. 2004;213(1):67-72.

Justenhoven C, Hamann U, Pesch B, et al. *ERCC2* genotypes and a corresponding haplotype are linked with breast cancer risk in a German population. *Cancer Epidemiol Biomarkers Prev* 2004;13(12):2059-64.

Liang G, Xing D, Miao X, et al. Sequence variations in the DNA repair gene *XPB* and risk of lung cancer in a Chinese population. *Int J Cancer* 2003;105(5):669-73.

Matullo G, Guarrera S, Carturan S, et al. DNA repair gene polymorphisms, bulky DNA adducts in white blood cells and bladder cancer in a case-control study. *Int J Cancer* 2001; 92: 562-567

Medina PP, Ahrendt SA, Pollan M, et al. Screening of homologous recombination gene polymorphisms in lung cancer patients reveals an association of the NBS1-185Gln variant and p53 gene mutations. *Cancer Epidemiol Biomarkers Prev* 2003;12(8):699-704

Misra RR, Ratnasinghe D, Tangrea JA, et al. Polymorphisms in the DNA repair genes *XPB*, *XRCC1*, *XRCC3*, and APE/ref-1, and the risk of lung cancer among male smokers in Finland. *Cancer Lett* 2003;191(2):171-8.

Park JY, Lee SY, Jeon HS, et al. No abstract Lys751Gln polymorphism in the DNA repair gene *XPB* and risk of primary lung cancer. *Lung Cancer* 2002;36(1):15-6.

Popanda O, Schattenberg T, Phong CT, et al. Specific combinations of DNA repair gene variants and increased risk for non-small cell lung cancer. *Carcinogenesis*. 2004;25(12):2433-41.

Rybicki BA, Conti DV, Moreira A, et al. DNA repair gene *XRCC1* and *XPB* polymorphisms and risk of prostate cancer. *Cancer Epidemiol Biomarkers Prev* 2004;13(1):23-9.

Sanyal S, Festa F, Sakano S, et al. Polymorphisms in DNA repair and metabolic genes in bladder cancer. *Carcinogenesis*. 2004;25(5):729-34.

Seedhouse C, Bainton R, Lewis M, et al. The genotype distribution of the *XRCC1* gene indicates a role for base excision repair in the development of therapy-related acute myeloblastic leukemia. *Blood*. 2002;100(10):3761-6

Shen H, Sturgis EM, Dahlstrom KR, et al. A variant of the DNA repair gene *XRCC3* and risk of squamous cell carcinoma of the head and neck: a case-control analysis. *Int J Cancer*. 2002;99(6):869-72.

Shen H, Wang X, Hu Z, et al. Polymorphisms of DNA repair gene *XRCC3* Thr241Met and risk of gastric cancer in a Chinese population. *Cancer Lett*. 2004;206(1):51-8.

Shen M, Hung RJ, Brennan P, et al. Polymorphisms of the DNA repair genes *XRCC1*, *XRCC3*, *XPB*, interaction with environmental exposures, and bladder cancer risk in a case-control study in northern Italy. *Cancer Epidemiol Biomarkers Prev* 2003;12(11 Pt 1):1234-40.

Shi Q, Wang LE, Bondy ML, et al. Reduced DNA repair of benzo[a]pyrene diol epoxide-induced adducts and common *XPB* polymorphisms in breast cancer patients. *Carcinogenesis* 2004;25(9):1695-700.

Smith TR, Miller MS, Lohman K, et al. Polymorphisms of *XRCC1* and *XRCC3* genes and susceptibility to breast cancer. *Cancer Lett* 2003a;190(2):183-90.

Smith TR, Levine EA, Perrier ND, et al. DNA-repair genetic polymorphisms and breast cancer risk. *Cancer Epidemiol Biomarkers Prev* 2003b;12(11 Pt 1):1200-4

Spitz MR, Wu X, Wang Y, et al. Modulation of nucleotide excision repair capacity by *XPB* polymorphisms in lung cancer patients. *Cancer Res* 2001 61, 1354-1357

Stern MC, Johnson LR, Bell DA, et al. Abstract *XPB* codon 751 polymorphism, metabolism genes, smoking, and bladder cancer risk. *Cancer Epidemiol Biomarkers Prev* 2002a;11(10 Pt 1):1004-11.

Stern MC, Umbach DM, Lunn RM, et al. DNA repair gene *XRCC3* codon 241 polymorphism, its interaction with smoking and *XRCC1* polymorphisms, and bladder cancer risk. *Cancer Epidemiol Biomarkers Prev* 2002b;11(9):939-43.

Sturgis EM, Castillo EJ, Li L, et al. *XPB/ERCC2* EXON 8 Polymorphisms: rarity and lack of significance in risk of squamous cell carcinoma of the head and neck. *Oral Oncol* 2002;38(5):475-7.

Sturgis EM, Zheng R, Li L, et al. *XPB/ERCC2* polymorphism and risk of head and neck cancer: a case-control analysis. *Carcinogenesis* 2000; 21:2219-2223

Tang D, Cho S, Rundle A, et al. Polymorphisms in the DNA repair enzyme *XPB* are associated with increased levels of PAH-DNA adducts in a case-control study of breast cancer. *Breast Cancer Res Treat* 2002;75(2):159-66.

Terry MB, Gammon MD, Zhang FF, et al. Polymorphism in the DNA repair gene *XPB*, polycyclic aromatic hydrocarbon-DNA adducts, cigarette smoking, and breast cancer risk. *Cancer Epidemiol Biomarkers Prev* 2004;13(12):2053-8.

Tomescu D, Kavanagh G, Ha T, et al. Nucleotide excision repair gene *XPB* polymorphisms and genetic predisposition to melanoma. *Carcinogenesis* 2001; 3: 403-8

Vogel U, Hedayati M, Dybdahl M, et al. Molecular epidemiology and cancer prevention ? Polymorphisms of the DNA repair gene *XPB*: correlations with risk of basal cell carcinoma revisited. *Carcinogenesis* 2001;22: 899-904

Wang LE, Bondy ML, Shen H, et al. Polymorphisms of DNA repair genes and risk of glioma. *Cancer Res* 2004;64(16):5560-3.

Wang Y, Liang D, Spitz MR, et al. *XRCC3* genetic polymorphism, smoking, and lung carcinoma risk in minority populations. *Cancer* 2003;98(8):1701-6.

Winsey SL, Haldar NA, Marsh HP, et al. A variant within the DNA repair gene *XRCC3* is associated with the development of melanoma skin cancer. *Cancer Res* 2000; 60 : 612-616

Xing D, Qi J, Miao X, et al. Polymorphisms of DNA repair genes *XRCC1* and *XPB* and their associations with risk of esophageal squamous cell carcinoma in a Chinese population. *Int J Cancer* 2002a;100(5):600-5.

Xing D, Tan W, Wei Q, et al. Polymorphisms of the DNA repair gene *XPB* and risk of lung cancer in a Chinese population. *Lung Cancer* 2002b;38(2):123-9.

Yeh CC, Sung FC, Tang R, et al. Polymorphisms of the *XRCC1*, *XRCC3*, & *XPB* genes, and colorectal cancer risk: A case-control study in Taiwan. *BMC Cancer*. 2005;5(1):12

Yin J, Rockenbauer E, Hedayati M, et al. Multiple single nucleotide polymorphisms on human chromosome 19q13.2-3 associate with risk of Basal cell carcinoma. *Cancer Epidemiol Biomarkers Prev* 2002;11(11):1449-53.

Yu HP, Wang XL, Sun X, et al. Polymorphisms in the DNA repair gene *XPB* and susceptibility to esophageal squamous cell carcinoma. *Cancer Genet Cytogenet* 2004;154(1):10-5.

Zhou W, Liu G, Miller DP, et al. Gene-environment interaction for the *ERCC2* polymorphisms and cumulative cigarette smoking exposure in lung cancer. *Cancer Res* 2002;62(5):1377-81.

**Table 1 Genotype and allele frequencies.**

**XRCC3-IVS6 1571**

| Study    | Year | Ethnicity  | Allele Freq (%) |     | Genotype Frequency (%) |      |     | N   | Hardy-Weinberg p |
|----------|------|------------|-----------------|-----|------------------------|------|-----|-----|------------------|
|          |      |            | T               | C   | TT                     | TC   | CC  |     |                  |
| Jacobsen | 2004 | Caucasians | 92.6            | 7.4 | 85.9                   | 13.4 | 0.7 | 269 | 0.715            |

**XRCC3-IVS5-14**

| Study    | Year  | Ethnicity  | Allele Freq (%) |      | Genotype Frequency (%) |      |      | N    |       |
|----------|-------|------------|-----------------|------|------------------------|------|------|------|-------|
|          |       |            | A               | G    | AA                     | AG   | GG   |      |       |
| Jacobsen | 2004  | Caucasians | 63.7            | 36.3 | 40.1                   | 47.2 | 12.7 | 269  | 0.735 |
| Han      | 2004c | Mixed      | 64.1            | 36.0 | 41.6                   | 44.9 | 13.5 | 659  | 0.521 |
| Han      | 2004a | Undefined  | 69.5            | 30.5 | 48.0                   | 43.0 | 9.0  | 1265 | 0.612 |

**XRCC3-Cod.241**

| Study        | Year | Ethnicity                | Allele Freq (%) |         | Genotype Frequency (%) |             |            | N          |                  |
|--------------|------|--------------------------|-----------------|---------|------------------------|-------------|------------|------------|------------------|
|              |      |                          | C (Thr)         | T (Met) | CC                     | CT          | TT         |            |                  |
| David-Beabes | 2001 | African-Americans        | 76.9            | 23.1    | 58.1                   | 37.6        | 4.3        | 234        | 0.372            |
| Wang         | 2003 | African-Americans        | 78.0            | 22.0    | 62.6                   | 30.8        | 6.6        | 91         | 0.327            |
|              |      | <b>African-Americans</b> |                 |         | <b>59.1</b>            | <b>35.4</b> | <b>4.6</b> | <b>325</b> |                  |
| Shen         | 2004 | Asians                   | 95.3            | 4.9     | 90.4                   | 9.7         | 0.0        | 166        | 0.500            |
| Yeh          | 2005 | Asians                   | 94.8            | 5.4     | 89.7                   | 10.1        | 0.3        | 736        | 0.855            |
|              |      | <b>Asians</b>            |                 |         | <b>89.8</b>            | <b>10.0</b> | <b>0.2</b> | <b>902</b> |                  |
| Winsey       | 2000 | Caucasians               | 70.5            | 29.5    | 52.0                   | 37.0        | 11.0       | 211        | 0.109            |
| Matullo      | 2001 | Caucasians               | 63.0            | 37.0    | 49.0                   | 28.0        | 23.0       | 85         | <b>&lt;0.001</b> |
| David-Beabes | 2001 | Caucasians               | 61.8            | 38.2    | 38.6                   | 46.4        | 15.0       | 453        | 0.713            |
| Seedhouse    | 2002 | Caucasians               | 70.9            | 29.2    | 52.6                   | 36.6        | 10.9       | 175        | 0.127            |
| Duan         | 2002 | Caucasians               | 61.2            | 38.9    | 36.4                   | 49.5        | 14.1       | 319        | 0.455            |
| Shen         | 2002 | Caucasians               | 63.8            | 36.2    | 39.8                   | 48.0        | 12.2       | 354        | 0.461            |
| Jacobsen     | 2003 | Caucasians               | 66.8            | 34.2    | 46.3                   | 41.0        | 13.7       | 315        | 0.081            |
| Jacobsen     | 2003 | Caucasians               | 61.4            | 38.9    | 37.9                   | 46.9        | 15.4       | 422        | 0.761            |
| Misra        | 2003 | Caucasians               | 71.0            | 29.0    | 49.0                   | 44.0        | 7.0        | 315        | 0.224            |
| Bertram      | 2004 | Caucasians               | 64.0            | 36.0    | 40.0                   | 48.0        | 12.0       | 335        | 0.446            |
| Shen         | 2003 | Caucasians               | 60.0            | 40.0    | 33.0                   | 54.0        | 13.0       | 214        | 0.067            |
| Sanyal       | 2004 | Caucasians               | 66.0            | 34.0    | 44.0                   | 44.0        | 12.0       | 246        | 0.758            |
| Harms        | 2004 | Caucasians               | 71.5            | 28.5    | 51.0                   | 41.0        | 8.0        | 119        | 0.948            |
| Wang         | 2004 | Caucasians               | 64.5            | 35.5    | 43.0                   | 43.0        | 14.0       | 342        | 0.259            |
| Benhamou     | 2004 | Caucasians               | 55.1            | 44.9    | 28.3                   | 53.6        | 18.1       | 166        | 0.283            |

|              |       |                   |      |      |             |             |             |             |              |
|--------------|-------|-------------------|------|------|-------------|-------------|-------------|-------------|--------------|
| Jacobsen     | 2004  | Caucasians        | 63.0 | 37.0 | 42.0        | 42.0        | 16.0        | 269         | 0.104        |
| Smith        | 2003  | Caucasians        | 62.8 | 35.3 | 38.7        | 48.1        | 11.2        | 268         | 0.218        |
|              |       | <b>Caucasians</b> |      |      | <b>41.4</b> | <b>44.9</b> | <b>12.4</b> | <b>4608</b> |              |
| Wang         | 2003  | Hispanic          | 77.8 | 22.2 | 62.6        | 30.3        | 7.1         | 99          | 0.220        |
| Stern        | 2002  | Mixed             | 67.0 | 33.0 | 45.0        | 44.0        | 11.0        | 209         | 0.943        |
| David-Beabes | 2001  | Mixed             | 67.0 | 33.1 | 45.3        | 43.4        | 11.4        | 687         | 0.587        |
| Smith        | 2003  | Mixed             | 60.5 | 39.6 | 37.1        | 46.7        | 16.2        | 302         | 0.685        |
| Wang         | 2003  | Mixed             | 81.3 | 18.7 | 62.6        | 37.4        | 0.0         | 190         | <b>0.002</b> |
| Han          | 2004b | Mixed             | 61.5 | 38.6 | 37.0        | 48.9        | 14.1        | 810         | 0.361        |
| Han          | 2004c | Mixed             | 65.1 | 34.9 | 42.1        | 46.0        | 11.9        | 665         | 0.751        |
| Han          | 2004a | Undefined         | 62.5 | 37.5 | 38.0        | 49.0        | 13.0        | 1245        | 0.110        |
| Popanda      | 2004  | Undefined         | 61.0 | 39.0 | 37.0        | 48.0        | 15.0        | 460         | 0.850        |
| Figueiredo   | 2004  | Undefined         | 61.2 | 38.8 | 36.3        | 49.8        | 13.9        | 402         | 0.330        |

#### **XRCC3-A4552C**

| Study | Year | Ethnicity | Allele Freq (%) |      | Genotype Frequency (%) |      |     | N   |       |
|-------|------|-----------|-----------------|------|------------------------|------|-----|-----|-------|
|       |      |           | A               | C    | AA                     | AC   | CC  |     |       |
| Han   | 2004 | Mixed     | 81.0            | 19.1 | 65.5                   | 30.9 | 3.6 | 861 | 0.956 |

#### **XRCC3-5' region pos.4541**

| Study    | Year  | Ethnicity         | Allele Freq (%) |      | Genotype Frequency (%) |             |             | N          |                      |
|----------|-------|-------------------|-----------------|------|------------------------|-------------|-------------|------------|----------------------|
|          |       |                   | A               | G    | AA                     | AG          | GG          |            |                      |
| Winsey   | 2000  | Caucasians        | 23.0            | 77.0 | 4.0                    | 38.0        | 58.0        | 211        | 0.290                |
| Jacobsen | 2004  | Caucasians        | 80.9            | 18.2 | 66.8                   | 28.1        | 4.1         | 268        | 0.334                |
|          |       | <b>Caucasians</b> |                 |      | <b>39.0</b>            | <b>32.4</b> | <b>27.6</b> | <b>479</b> |                      |
| Han      | 2004c | Mixed             | 81.2            | 18.9 | 66.1                   | 30.1        | 3.8         | 663        | 0.678                |
| Han      | 2004a | Undefined         | 79.5            | 20.5 | 67.0                   | 25.0        | 8.0         | 1291       | <b>&lt;&lt;0.001</b> |

#### **XPB/ERCC2-Intron 4**

| Study | Year | Ethnicity  | Allele Freq (%) |      | Genotype Frequency (%) |      |      | N  |       |
|-------|------|------------|-----------------|------|------------------------|------|------|----|-------|
|       |      |            | A               | G    | AA                     | AG   | GG   |    |       |
| Yin   | 2002 | Caucasians | 40.2            | 59.8 | 20.6                   | 39.2 | 40.2 | 97 | 0.069 |

#### **XPB/ERCC2-Cod.751**

| Study        | Year | Ethnicity         | Allele Freq (%) |         | Genotype Frequency (%) |      |      | N   |       |
|--------------|------|-------------------|-----------------|---------|------------------------|------|------|-----|-------|
|              |      |                   | C (Gln)         | A (Lys) | CC                     | CA   | AA   |     |       |
| David-Beabes | 2001 | African-Americans | 25.1            | 75.1    | 5.6                    | 38.9 | 55.6 | 234 | 0.586 |

|              |       |                               |      |      |             |             |             |             |                  |
|--------------|-------|-------------------------------|------|------|-------------|-------------|-------------|-------------|------------------|
| Stern        | 2002a | African<br>-Americans         | 65.0 | 35.0 | 38.0        | 54.0        | 8.0         | 13          | 0.501            |
|              |       | <b>African<br/>-Americans</b> |      |      | <b>6.9</b>  | <b>39.7</b> | <b>53.0</b> | <b>247</b>  |                  |
| Park         | 2002  | Asians                        | 5.5  | 94.5 | 0.0         | 11.0        | 89.0        | 163         | 0.457            |
| Xing         | 2002  | Asians                        | 7.3  | 92.8 | 0.6         | 13.3        | 86.1        | 524         | 0.800            |
| Liang        | 2003  | Asians                        | 8.7  | 91.3 | 0.6         | 16.3        | 83.1        | 1010        | 0.494            |
| Chen         | 2002  | Asians                        | 40.4 | 59.7 | 18.3        | 44.1        | 37.6        | 109         | 0.381            |
| Xing         | 2002  | Asians                        | 7.2  | 92.8 | 0.8         | 12.8        | 86.4        | 383         | 0.409            |
| Yu           | 2004  | Asians                        | 6.9  | 93.1 | 1.3         | 11.2        | 87.5        | 152         | 0.114            |
| Yeh          | 2005  | Asians                        | 7.2  | 92.9 | 0.6         | 13.1        | 86.3        | 736         | 0.717            |
|              |       | <b>Asians</b>                 |      |      | <b>1.1</b>  | <b>14.9</b> | <b>83.6</b> | <b>3077</b> |                  |
| Sturgis      | 2000  | Caucasians                    | 33.8 | 66.3 | 11.5        | 44.5        | 44.0        | 496         | 0.913            |
| Dybdahl      | 1999  | Caucasians                    | 40.0 | 60.0 | 20.0        | 40.0        | 40.0        | 20          | 0.456            |
| Winsey       | 2000  | Caucasians                    | 40.5 | 59.5 | 15.0        | 51.0        | 34.0        | 211         | 0.398            |
| Spitz        | 2001  | Caucasians                    | 33.3 | 66.7 | 10.8        | 45.0        | 44.2        | 360         | 0.805            |
| Vogel        | 2001  | Caucasians                    | 36.4 | 63.7 | 10.3        | 52.1        | 37.6        | 117         | 0.173            |
| Matullo      | 2001  | Caucasians                    | 45.5 | 54.5 | 17.0        | 57.0        | 26.0        | 85          | 0.169            |
| Caggana      | 2001  | Caucasians                    | 41.5 | 58.5 | 16.0        | 51.0        | 33.0        | 148         | 0.540            |
| Stern        | 2002a | Caucasians                    | 37.5 | 62.5 | 15.0        | 45.0        | 40.0        | 197         | 0.575            |
| David-Beabes | 2001  | Caucasians                    | 34.7 | 65.3 | 12.8        | 43.7        | 43.5        | 453         | 0.458            |
| Seedhouse    | 2002  | Caucasians                    | 37.0 | 63.0 | 15.1        | 43.8        | 41.1        | 73          | 0.605            |
| Misra        | 2003  | Caucasians                    | 40.5 | 59.5 | 15.0        | 51.0        | 34.0        | 315         | 0.302            |
| Rybicki      | 2004  | Caucasians                    | 35.6 | 64.5 | 12.0        | 47.1        | 40.9        | 437         | 0.560            |
| Shen         | 2003  | Caucasians                    | 40.0 | 60.0 | 17.0        | 46.0        | 37.0        | 214         | 0.542            |
| Baccarelli   | 2004  | Caucasians                    | 42.7 | 57.3 | 18.7        | 48.0        | 33.3        | 177         | 0.800            |
| Sanyal       | 2004  | Caucasians                    | 38.0 | 62.0 | 15.0        | 46.0        | 39.0        | 246         | 0.709            |
| Harms        | 2004  | Caucasians                    | 27.5 | 72.5 | 6.0         | 43.0        | 51.0        | 119         | 0.393            |
| Shi          | 2004  | Caucasians                    | 29.8 | 70.3 | 7.6         | 44.3        | 48.1        | 79          | 0.595            |
| Allan        | 2004  | Caucasians                    | 36.5 | 63.5 | 15.0        | 43.0        | 42.0        | 729         | 0.051            |
| Zhou         | 2002  | Caucasians                    | 36.0 | 63.0 | 13.0        | 46.0        | 40.0        | 1240        | 0.595            |
| Justenhoven  | 2004  | Caucasians                    | 36.5 | 63.5 | 14.0        | 45.0        | 41.0        | 643         | 0.459            |
|              |       | <b>Caucasians</b>             |      |      | <b>13.4</b> | <b>45.8</b> | <b>40.1</b> | <b>6359</b> |                  |
| David-Beabes | 2001  | Mixed                         | 31.4 | 68.7 | 10.3        | 42.1        | 47.6        | 687         | 0.566            |
| Buch         | 2005  | Mixed                         | 27.5 | 72.5 | 11.9        | 31.2        | 56.9        | 269         | <b>&lt;0.001</b> |
| Tang         | 2002  | Undefined                     | 36.4 | 63.6 | 17.4        | 38.0        | 44.6        | 121         | <b>0.049</b>     |
| Allan        | 2004  | Undefined                     | 36.5 | 63.5 | 15.0        | 43.0        | 42.0        | 729         | 0.051            |
| Popanda      | 2004  | Undefined                     | 36.5 | 63.5 | 14.0        | 45.0        | 41.0        | 460         | 0.531            |
| Terry        | 2005  | Undefined                     | 36.3 | 63.7 | 13.7        | 45.2        | 41.1        | 1102        | 0.453            |

#### **XPD/ERCC2-Cod.711**

| Study | Year | Ethnicity | Allele Freq<br>(%) |            | Genotype Frequency<br>(%) |    |    | N |
|-------|------|-----------|--------------------|------------|---------------------------|----|----|---|
|       |      |           | C<br>(Asp)         | T<br>(Asp) | CC                        | CT | TT |   |



|         |      |            |      |      |      |      |      |     |       |
|---------|------|------------|------|------|------|------|------|-----|-------|
| Caggana | 2001 | Caucasians | 67.0 | 32.0 | 46.0 | 42.0 | 11.0 | 140 | 0.658 |
|---------|------|------------|------|------|------|------|------|-----|-------|

#### ***XPD/ERCC2-Cod.312***

| Study       | Year | Ethnicity         | Allele Freq (%) |         | Genotype Frequency (%) |             |             | N           |              |
|-------------|------|-------------------|-----------------|---------|------------------------|-------------|-------------|-------------|--------------|
|             |      |                   | G (Asp)         | A (Asn) | GG                     | GA          | AA          |             |              |
| Xing        | 2002 | Asians            | 93.9            | 6.1     | 88.0                   | 11.8        | 0.2         | 524         | 0.492        |
| Liang       | 2003 | Asians            | 93.5            | 6.5     | 87.2                   | 12.8        | 0.1         | 1020        | 0.083        |
| Xing        | 2002 | Asians            | 94.2            | 5.9     | 88.3                   | 11.7        | 0.0         | 383         | 0.224        |
| Yu          | 2004 | Asians            | 94.8            | 5.3     | 89.5                   | 10.5        | 0.0         | 152         | 0.495        |
|             |      | <b>Asians</b>     |                 |         | <b>87.7</b>            | <b>12.0</b> | <b>0.0</b>  | <b>2079</b> |              |
| Winsey      | 2000 | Caucasians        | 64.5            | 35.5    | 42.0                   | 45.0        | 13.0        | 211         | 0.801        |
| Spitz       | 2001 | Caucasians        | 72.8            | 27.3    | 52.5                   | 40.5        | 7.0         | 360         | 0.684        |
| Butkiewicz  | 2001 | Caucasians        | 56.5            | 43.5    | 31.0                   | 51.0        | 18.0        | 96          | 0.713        |
| Vogel       | 2001 | Caucasians        | 62.4            | 37.7    | 43.8                   | 37.1        | 19.1        | 105         | <b>0.032</b> |
| Caggana     | 2001 | Caucasians        | 64.5            | 35.5    | 41.0                   | 47.0        | 12.0        | 137         | 0.758        |
| Misra       | 2003 | Caucasians        | 63.5            | 36.5    | 40.0                   | 47.0        | 13.0        | 315         | 0.805        |
| Rybicki     | 2004 | Caucasians        | 66.2            | 33.9    | 41.2                   | 49.9        | 8.9         | 437         | <b>0.017</b> |
| Baccarelli  | 2004 | Caucasians        | 60.2            | 39.9    | 34.3                   | 51.7        | 14.0        | 172         | 0.304        |
| Shi         | 2004 | Caucasians        | 75.3            | 24.7    | 58.2                   | 34.2        | 7.6         | 79          | 0.474        |
| Zhou        | 2002 | Caucasians        | 67.0            | 33.0    | 44.0                   | 46.0        | 10.0        | 1240        | 0.156        |
| Justenhoven | 2004 | Caucasians        | 66.0            | 34.0    | 45.0                   | 42.0        | 13.0        | 610         | 0.113        |
|             |      | <b>Caucasians</b> |                 |         | <b>43.5</b>            | <b>45.1</b> | <b>11.1</b> | <b>3762</b> |              |
| Tang        | 2002 | Undefined         | 78.6            | 21.4    | 66.1                   | 25.0        | 8.9         | 112         | <b>0.007</b> |
| Popanda     | 2004 | Undefined         | 63.5            | 36.5    | 42.0                   | 43.0        | 15.0        | 460         | 0.121        |

#### ***XPD/ERCC2-Cod.156***

| Study   | Year | Ethnicity         | Allele Freq (%) |         | Genotype Frequency (%) |             |             | N          |       |
|---------|------|-------------------|-----------------|---------|------------------------|-------------|-------------|------------|-------|
|         |      |                   | C (Arg)         | A (Arg) | CC                     | CA          | AA          |            |       |
| Sturgis | 2000 | Caucasians        | 55.4            | 44.7    | 31.1                   | 48.6        | 20.4        | 496        | 0.691 |
| Dybdahl | 1999 | Caucasians        | 62.5            | 37.5    | 40.0                   | 45.0        | 15.0        | 20         | 0.858 |
| Winsey  | 2000 | Caucasians        | 60.0            | 40.0    | 33.0                   | 54.0        | 13.0        | 211        | 0.069 |
| Vogel   | 2001 | Caucasians        | 59.0            | 41.0    | 37.8                   | 42.3        | 19.8        | 111        | 0.189 |
| Caggana | 2001 | Caucasians        | 61.5            | 38.5    | 40.0                   | 43.0        | 17.0        | 139        | 0.278 |
|         |      | <b>Caucasians</b> |                 |         | <b>33.5</b>            | <b>47.9</b> | <b>17.9</b> | <b>977</b> |       |

#### ***XPD/ERCC2-201***

| Study   | Year | Ethnicity  | Allele Freq (%) |         | Genotype Frequency (%) |     |     | N   |
|---------|------|------------|-----------------|---------|------------------------|-----|-----|-----|
|         |      |            | C (His)         | T (Tyr) | CC                     | CT  | TT  |     |
| Sturgis | 2002 | Caucasians | 100.0           | 0.0     | 100.0                  | 0.0 | 0.0 | 400 |

***XPD/ERCC2-199***

| Study   | Year | Ethnicity  | Allele Freq (%) |         | Genotype Frequency (%) |     |     | N   |       |
|---------|------|------------|-----------------|---------|------------------------|-----|-----|-----|-------|
|         |      |            | C (Ile)         | G (Met) | CC                     | CG  | GG  |     |       |
| Sturgis | 2002 | Caucasians | 99.2            | 0.9     | 98.3                   | 1.7 | 0.0 | 400 | 0.864 |

**Table 2. Study design: *XPD/ERCC2***

| Study        | Date | Nationality | Polymorphisms                                                                                                                                                                                                                                                                                          | Cancer Site   | Method           | Design           | Ethnic group                    | No. case-controls              | Exposure         |
|--------------|------|-------------|--------------------------------------------------------------------------------------------------------------------------------------------------------------------------------------------------------------------------------------------------------------------------------------------------------|---------------|------------------|------------------|---------------------------------|--------------------------------|------------------|
| Dybdahl      | 1999 | Denmark     | <i>XPD/ERCC2</i> Cod.751<br><i>XPD/ERCC2</i> Cod.156                                                                                                                                                                                                                                                   | Skin          | PCR-RFLP         | H-B casecontrol  | Caucasian                       | 40/40                          | NULL             |
| Sturgis      | 2000 | USA         | <i>XPD/ERCC2</i> Cod.751<br><i>XPD/ERCC2</i> Cod.156                                                                                                                                                                                                                                                   | Head and neck | PCR-RFLP         | H-B case-control | Non-Hispanic whites             | 189/496                        | Smoking, alcohol |
| Winsey       | 2000 | UK          | <i>XRCC1</i> Cod.399<br><i>XPD/ERCC2</i> Cod.751<br><i>XPD/ERCC2</i> Cod.156<br><i>XRCC1</i> Cod.194<br><i>XPD/ERCC2</i> Cod.312<br><i>XPF/ERCC4</i> 5' UTR pos.2063<br><i>XPF/ERCC4</i> Exon 11 pos.30028<br><i>ERCC1</i> Exon 4 pos.19007<br><i>XRCC3</i> Cod.241<br><i>XRCC3</i> 5' region pos.4541 | Skin          | PCR-SSCP         | H-B case control | Caucasians                      | 125/211                        | NULL             |
| Butkiewicz   | 2001 | Poland      | <i>XPD/ERCC2</i> Cod.312                                                                                                                                                                                                                                                                               | Lung          | PCR-RFLP         | P-B case-control | Whites                          | 96/96+52 members of 4 families | Smoking<br>NULL  |
| Caggana      | 2001 | USA         | <i>XPD/ERCC2</i> Cod.751<br><i>XPD/ERCC2</i> Cod.156<br><i>XPD/ERCC2</i> Cod.312<br><i>XPD/ERCC2</i> Cod.711                                                                                                                                                                                           | Glioma        | PCR-RFLP         | P-B case control | Caucasian and Others            | 187/169                        | NULL             |
| David-Beabes | 2001 | USA         | <i>XPD/ERCC2</i> Cod.751<br><i>XRCC3</i> Cod.241                                                                                                                                                                                                                                                       | Lung          | PCR-RFLP         | P-B case-control | Caucasians<br>African Americans | 331/687                        | NULL             |
| Matullo      | 2001 | Italy       | <i>XRCC1</i> Cod.399<br><i>XPD/ERCC2</i> Cod.751<br><i>XRCC3</i> Cod.241                                                                                                                                                                                                                               | Bladder       | PCR-RFLP         | H-B case-control | Caucasians                      | 124/85                         | Smoking          |
| Spitz        | 2001 | USA         | <i>XPD/ERCC2</i> Cod.751<br><i>XPD/ERCC2</i> Cod.312                                                                                                                                                                                                                                                   | Lung          | PCR-RFLP<br>HCRA | H-B case-control | Whites                          | 341/360                        | Smoking,alcohol  |
| Tomescu      | 2001 | Scotland    | <i>XPD/ERCC2</i> Cod.751<br><i>XPD/ERCC2</i> Cod.156<br><i>ERCC1</i> Exon 4 pos.19007<br><i>XPD/ERCC2</i> Cod.711<br><i>CKM</i> Exon 8<br><i>CKM</i> 3'                                                                                                                                                | Skin          | PCR-RFLP         | H-B case-control | Caucasians                      | 28/28                          | NULL             |

|           |       |              |                                                                                                                                                                                                                                                  |                                |          |                  |                     |           |                     |
|-----------|-------|--------------|--------------------------------------------------------------------------------------------------------------------------------------------------------------------------------------------------------------------------------------------------|--------------------------------|----------|------------------|---------------------|-----------|---------------------|
| Vogel     | 2001  | USA          | <i>XPB/ERCC2</i> Cod.751<br><i>XPB/ERCC2</i> Cod.156<br><i>XPB/ERCC2</i> Cod.312                                                                                                                                                                 | Skin                           | PCR-RFLP | H-B case-control | Caucasians          | 70/117    | Sunburns, skin type |
| Chen      | 2002  | USA<br>China | <i>XRCC1</i> Cod.399<br><i>XPB/ERCC2</i> Cod.751<br><i>XRCC1</i> Cod.194                                                                                                                                                                         | Lung                           | PCR-RFLP | P-B case control | Asians              | 109/109   | Smoking             |
| Hou       | 2002  | Sweden       | <i>XPB/ERCC2</i> Cod.751<br><i>XPB/ERCC2</i> Cod.312                                                                                                                                                                                             | Lung                           | PCR-RFLP | P-B case control | Undefined           | 185/162   | Smoking             |
| Park      | 2002  | South Korea  | <i>XPB/ERCC2</i> Cod.751                                                                                                                                                                                                                         | Lung                           | PCR-RFLP | H-B case-control | Asians              | 250/163   | Smoking             |
| Seedhouse | 2002  | UK           | <i>XRCC1</i> Cod.399<br><i>XPB/ERCC2</i> Cod.751<br><i>XRCC1</i> Cod.194<br><i>XRCC3</i> Cod.241<br><i>NQO1</i> Cod. 187                                                                                                                         | Leukemia<br>Secondary leukemia | PCR-RFLP | H-B case control | Caucasians          | 168/178   | NULL                |
| Stern     | 2002a | USA          | <i>XPB/ERCC2</i> Cod.751                                                                                                                                                                                                                         | Bladder                        | PCR-RFLP | H-B case-control | Whites and blacks   | 228/210   | Smoking             |
| Sturgis   | 2002  | USA          | <i>XPB/ERCC2</i> 23047<br><i>XPB/ERCC2</i> 23051                                                                                                                                                                                                 | Head and neck                  | PCR-RFLP | H-B case control | Non-Hispanic whites | 180/400   | NULL                |
| Tang      | 2002  | USA          | <i>XPB/ERCC2</i> Cod.751<br><i>XPB/ERCC2</i> Cod.312                                                                                                                                                                                             | Breast                         | PCR-RFLP | H-B case control | Undefined           | 103/215   | NULL                |
| Xing      | 2002a | China        | <i>XRCC1</i> Cod.399<br><i>XPB/ERCC2</i> Cod.751<br><i>XRCC1</i> Cod.194<br><i>XPB/ERCC2</i> Cod.312                                                                                                                                             | Esophageal                     | PCR-RFLP | P-B case control | Asians              | 433/524   | Smoking             |
| Xing      | 2002b | China        | <i>XPB/ERCC2</i> Cod.751<br><i>XPB/ERCC2</i> Cod.312                                                                                                                                                                                             | Lung                           | PCR-RFLP | P-B case control | Asians              | 351/383   | Smoking             |
| Yin       | 2002  | Denmark      | <i>XRCC1</i> Cod.399<br><i>ERCC1</i> Exon 4 pos.19007<br><i>CKM</i> Exon 8<br><i>LIG1</i> exon 6<br><i>XPB/ERCC2</i> Intron 4<br><i>RAI</i> Exon 6<br><i>RAI</i> Intron 1<br><i>FOSB</i> Exon 4<br><i>SLC1A5</i> Exon 8<br><i>GLTSCR1</i> Exon 1 | Skin                           | TaqMan   | H-B case control | Caucasians          | 97/58     | NULL                |
| Zhou      | 2002  | USA          | <i>XPB/ERCC2</i> Cod.751                                                                                                                                                                                                                         | Lung                           | PCR-RFLP | P-B case control | Caucasians          | 1092/1240 | Smoking             |

|             |      |              |                                                                                                                                                      |          |                    |                  |            |           |          |
|-------------|------|--------------|------------------------------------------------------------------------------------------------------------------------------------------------------|----------|--------------------|------------------|------------|-----------|----------|
|             |      |              | <i>XPB/ERCC2</i> Cod.312                                                                                                                             |          |                    |                  |            |           |          |
| Gao         | 2003 | USA          | <i>XRCC1</i> Cod.399<br><i>XPB/ERCC2</i> Cod.751<br><i>XPB/ERCC2</i> Cod.312                                                                         | Lung     | TaqMan             | Case-Only        | Caucasians | 204       | Smoking  |
| Liang       | 2003 | China        | <i>XPB/ERCC2</i> Cod.751<br><i>XPB/ERCC2</i> Cod.312                                                                                                 | Lung     | PCR-RFLP           | P-B case control | Asians     | 1006/1020 | Smoking  |
| Misra       | 2003 | Finland      | <i>XRCC1</i> Cod.399<br><i>XPB/ERCC2</i> Cod.751<br><i>XPB/ERCC2</i> Cod.312<br><i>XRCC3</i> Cod.241<br><i>XRCC1</i> Cod.280<br><i>APEX</i> Cod. 148 | Lung     | TaqMan             | P-B case control | Caucasians | 315/315   | Smoking  |
| Shen        | 2003 | USA<br>Italy | <i>XRCC1</i> Cod.399<br><i>XPB/ERCC2</i> Cod.751<br><i>XRCC3</i> Cod.241                                                                             | Bladder  | PCR-RFLP           | H-B case control | Caucasians | 201/214   | Smoking  |
| Allan       | 2004 | UK           | <i>XPB/ERCC2</i> Cod.751                                                                                                                             | Leukemia | PCR-RFLP           | P-B case control | Undefined  | 852/729   | NULL     |
| Baccarelli  | 2004 | USA<br>Italy | <i>XPB/ERCC2</i> Cod.751<br><i>XPB/ERCC2</i> Cod.312                                                                                                 | Skin     | TaqMan             | P-B case control | Caucasians | 176/177   | Sunlight |
| Brewster    | 2004 | USA          | <i>XPB/ERCC2</i> Cod.751                                                                                                                             | Skin     | TaqMan             | Case-cohort      | Undefined  | 80/401    | Smoking  |
| Harms       | 2004 | USA          | <i>XRCC1</i> Cod.399<br><i>XPB/ERCC2</i> Cod.751<br><i>XRCC3</i> Cod.241                                                                             | Lung     | PCR-RFLP           | H-B case control | Caucasians | 110/119   | Smoking  |
| Justenhoven | 2004 | Germany      | <i>XPB/ERCC2</i> Cod.751<br><i>XPB/ERCC2</i> Cod.312                                                                                                 | Breast   | Sequencing         | P-B case control | Caucasians | 688/724   | Smoking  |
| Popanda     | 2004 | Germany      | <i>XRCC1</i> Cod.399<br><i>XPB/ERCC2</i> Cod.751<br><i>XPB/ERCC2</i> Cod.312<br><i>XRCC3</i> Cod.241<br><i>XPA</i> 5' NCR<br><i>APEX</i> Cod. 148    | Lung     | PCR-RFLP           | H-B case control | Caucasians | 463/460   | Smoking  |
| Rybicki     | 2004 | USA          | <i>XRCC1</i> Cod.399<br><i>XPB/ERCC2</i> Cod.751<br><i>XPB/ERCC2</i> Cod.312                                                                         | Prostate | PCR-RFLP           | P-B case control | Caucasians | 637/480   | NULL     |
| Sanyal      | 2004 | Sweden       | <i>XRCC1</i> Cod.399<br><i>XPB/ERCC2</i> Cod.751<br><i>XRCC3</i> Cod.241                                                                             | Bladder  | TaqMan<br>PCR-RFLP | H-B case control | Caucasians | 327/246   | NULL     |

|       |      |        |                                                                                                                                                                                                                                            |            |          |                  |                     |           |                    |
|-------|------|--------|--------------------------------------------------------------------------------------------------------------------------------------------------------------------------------------------------------------------------------------------|------------|----------|------------------|---------------------|-----------|--------------------|
|       |      |        | <i>CCND1</i> Cod.870<br><i>XPG</i> Cod. 1104<br><i>NQO1</i> Exon 6<br><i>NBS1</i> Cod. 185<br><i>XPC</i> exon 4<br><i>MTHFR</i> exon 4<br><i>MTHFR</i> exon 7<br><i>NQO1</i> exon 4<br><i>H-ras</i> exon 1<br><i>GSTT1</i> Deletion allele |            |          |                  |                     |           |                    |
| Shi   | 2004 | USA    | <i>XPB/ERCC2</i> Cod.751<br><i>XPB/ERCC2</i> Cod.312                                                                                                                                                                                       | Breast     | PCR-RFLP | H-B case control | Non-Hispanic whites | 69/79     | Smoking            |
| Yu    | 2004 | China  | <i>XPB/ERCC2</i> Cod.751<br><i>XPB/ERCC2</i> Cod.312                                                                                                                                                                                       | Esophageal | PCR-RFLP | H-B case control | Asians              | 135/152   | Smoking<br>Alcohol |
| Terry | 2005 | USA    | <i>XPB/ERCC2</i> Cod.751                                                                                                                                                                                                                   | Breast     | Other    | P-B case control | Undefined           | 1053/1102 | Smoking            |
| Yeh   | 2005 | Taiwan | <i>XRCC1</i> Cod.399<br><i>XPB/ERCC2</i> Cod.751<br><i>XRCC3</i> Cod.241                                                                                                                                                                   | Colorectal | PCR-RFLP | H-B case control | Asians              | 727/736   | NULL               |

**Table 3. Study design: *XRCC3***

| Study                        | Date  | Nationality | Polymorphisms                                                                                                                                                                                                                                                                                          | Cancer Site                    | Method                 | Design           | Ethnic group                    | Num. case-controls | Exposures          |
|------------------------------|-------|-------------|--------------------------------------------------------------------------------------------------------------------------------------------------------------------------------------------------------------------------------------------------------------------------------------------------------|--------------------------------|------------------------|------------------|---------------------------------|--------------------|--------------------|
| <a href="#">Winsey</a>       | 2000  | UK          | <i>XRCC1</i> Cod.399<br><i>XPB/ERCC2</i> Cod.751<br><i>XPB/ERCC2</i> Cod.156<br><i>XRCC1</i> Cod.194<br><i>XPB/ERCC2</i> Cod.312<br><i>XPB/ERCC4</i> 5' UTR pos.2063<br><i>XPB/ERCC4</i> Exon 11 pos.30028<br><i>ERCC1</i> Exon 4 pos.19007<br><i>XRCC3</i> Cod.241<br><i>XRCC3</i> 5' region pos.4541 | Skin                           | PCR-SSCP               | H-B case control | Caucasians                      | 125/211            | NULL               |
| <a href="#">David-Beabes</a> | 2001  | USA         | <i>XPB/ERCC2</i> Cod.751<br><i>XRCC3</i> Cod.241                                                                                                                                                                                                                                                       | Lung                           | PCR-RFLP               | P-B case-control | Caucasians<br>African Americans | 331/687            | Smoking            |
| <a href="#">Matullo</a>      | 2001  | Italy       | <i>XRCC1</i> Cod.399<br><i>XPB/ERCC2</i> Cod.751<br><i>XRCC3</i> Cod.241                                                                                                                                                                                                                               | Bladder                        | PCR-RFLP               | H-B case-control | Caucasians                      | 124/85             | Smoking            |
| <a href="#">Duan</a>         | 2002  | USA         | <i>XRCC3</i> Cod.241                                                                                                                                                                                                                                                                                   | Skin                           | PCR-RFLP               | H-B case control | Non-Hispanic whites             | 305/319            | NULL               |
| <a href="#">Seedhouse</a>    | 2002  | UK          | <i>XRCC1</i> Cod.399<br><i>XPB/ERCC2</i> Cod.751<br><i>XRCC1</i> Cod.194<br><i>XRCC3</i> Cod.241<br><i>NQO1</i> Cod. 187                                                                                                                                                                               | Leukemia<br>Secondary leukemia | PCR-RFLP               | H-B case control | Caucasians                      | 168/178            | NULL               |
| <a href="#">Shen</a>         | 2002  | USA         | <i>XRCC3</i> Cod.241                                                                                                                                                                                                                                                                                   | Head and neck                  | PCR-SSCP               | H-B case control | Non-Hispanic whites             | 367/354            | Smoking<br>Alcohol |
| <a href="#">Stern</a>        | 2002b | USA         | <i>XRCC3</i> Cod.241                                                                                                                                                                                                                                                                                   | Bladder                        | PCR-RFLP               | H-B case-control | White or black                  | 233/209            | Smoking            |
| <a href="#">Jacobsen</a>     | 2003  | Denmark     | <i>XRCC3</i> Cod.241                                                                                                                                                                                                                                                                                   | Breast<br>Skin                 | PCR-RFLP<br>Sequencing | H-B case control | Caucasians                      | 319/321<br>426/424 | NULL               |
| <a href="#">Medina</a>       | 2003  | USA         | <i>XRCC3</i> Cod.241<br><i>BRCA2</i> Cod. 372<br><i>NBS1</i> Cod. 185                                                                                                                                                                                                                                  | Lung                           | PCR-RFLP               | Case-Only        | Caucasians<br>African-Americans | 109                | NULL               |
| <a href="#">Misra</a>        | 2003  | Finland     | <i>XRCC1</i> Cod.399<br><i>XPB/ERCC2</i> Cod.751<br><i>XPB/ERCC2</i> Cod.312<br><i>XRCC3</i> Cod.241                                                                                                                                                                                                   | Lung                           | TaqMan                 | P-B case control | Caucasians                      | 315/315            | Smoking            |

|                            |       |              |                                                                                                                                                                                                                  |                           |                        |                  |                                        |           |                    |
|----------------------------|-------|--------------|------------------------------------------------------------------------------------------------------------------------------------------------------------------------------------------------------------------|---------------------------|------------------------|------------------|----------------------------------------|-----------|--------------------|
|                            |       |              | <i>XRCC1</i> Cod.280<br><i>APEX</i> Cod. 148                                                                                                                                                                     |                           |                        |                  |                                        |           |                    |
| <a href="#">Shen</a>       | 2003  | USA<br>Italy | <i>XRCC1</i> Cod.399<br><i>XPD/ERCC2</i> Cod.751<br><i>XRCC3</i> Cod.241                                                                                                                                         | Bladder                   | PCR-RFLP               | H-B case control | Caucasians                             | 201/214   | Smoking            |
| <a href="#">Smith</a>      | 2003a | USA          | <i>XRCC1</i> Cod.399<br><i>XRCC1</i> Cod.194<br><i>XRCC3</i> Cod.241                                                                                                                                             | Breast                    | PCR-RFLP               | P-B case control | Undefined                              | 162/302   | NULL               |
| <a href="#">Smith</a>      | 2003b | USA          | <i>XRCC1</i> Cod.399<br><i>XRCC1</i> Cod.194<br><i>XRCC3</i> Cod.241<br><i>XPF/ERCC4</i> Cod. 415                                                                                                                | Breast                    | PCR-RFLP<br>Sequencing | H-B case control | Undefined                              | 253/268   | NULL               |
| <a href="#">Wang</a>       | 2003  | USA          | <i>XRCC3</i> Cod.241                                                                                                                                                                                             | Lung                      | PCR-RFLP               | P-B case control | African-Americans<br>Mexican-Americans | 112/190   | Smoking            |
| <a href="#">Benhamou</a>   | 2004  | France       | <i>XRCC3</i> Cod.241<br><i>XRCC2</i> Cod 188                                                                                                                                                                     | Oral<br>Pharynx<br>Larynx | PCR-RFLP               | H-B case control | Caucasians                             | 250/172   | Smoking            |
| <a href="#">Bertram</a>    | 2004  | UK           | <i>XRCC3</i> Cod.241                                                                                                                                                                                             | Skin                      | PCR-RFLP               | P-B case control | Caucasians                             | 140/335   | NULL               |
| <a href="#">Figueiredo</a> | 2004  | Canada       | <i>XRCC1</i> Cod.399<br><i>XRCC3</i> Cod.241                                                                                                                                                                     | Breast                    | Other                  | P-B case control | Undefined                              | 402/402   | Smoking<br>Alcohol |
| <a href="#">Han</a>        | 2004a | USA          | <i>XRCC3</i> Cod.241<br><i>XRCC3</i> 5' region pos.4541<br><i>XRCC2</i> Cod 188<br><i>XRCC3</i> IVS5-14<br><i>LIG4</i> C299T<br><i>LIG4</i> Cod. 501                                                             | Breast                    | TaqMan                 | P-B case control | Undefined                              | 1004/1385 | NULL               |
| <a href="#">Han</a>        | 2004b | USA          | <i>XRCC3</i> Cod.241<br><i>XRCC2</i> Cod 188<br><i>LIG4</i> C4062T<br><i>LIG4</i> C4044T<br><i>LIG4</i> Cod. 501<br><i>XRCC2</i> C29244T<br><i>XRCC2</i> A31342G<br><i>XRCC2</i> G30833A<br><i>XRCC2</i> G30935A | Skin                      | TaqMan                 | P-B case control | Caucasians<br>Asians<br>Hispanics      | 805/873   | NULL               |



|                          |       |         |                                                                                                                                                                                                                                                                                                                        |             |                    |                  |            |         |                    |
|--------------------------|-------|---------|------------------------------------------------------------------------------------------------------------------------------------------------------------------------------------------------------------------------------------------------------------------------------------------------------------------------|-------------|--------------------|------------------|------------|---------|--------------------|
|                          |       |         | <i>XRCC3</i> A4552C                                                                                                                                                                                                                                                                                                    |             |                    |                  |            |         |                    |
|                          |       |         | <i>XRCC3</i> Cod.241<br><i>XRCC3</i> 5' region pos.4541<br><i>XRCC2</i> Cod.188<br><i>XRCC3</i> IVS5-14                                                                                                                                                                                                                |             |                    |                  |            |         |                    |
| <a href="#">Han</a>      | 2004c | USA     |                                                                                                                                                                                                                                                                                                                        | Endometrial | TaqMan             | H-B case control | Undefined  | 220/666 | NULL               |
|                          |       |         | <i>XRCC1</i> Cod.399<br><i>XPB/ERCC2</i> Cod.751<br><i>XRCC3</i> Cod.241                                                                                                                                                                                                                                               |             |                    |                  |            |         |                    |
| <a href="#">Harms</a>    | 2004  | USA     |                                                                                                                                                                                                                                                                                                                        | Lung        | PCR-RFLP           | H-B case control | Caucasians | 110/119 | Smoking            |
|                          |       |         | <i>XRCC3</i> Cod.241<br><i>XRCC3</i> 5' region pos.4541<br><i>XRCC3</i> IVS5-14<br><i>XRCC3</i> IVS6 1571                                                                                                                                                                                                              |             |                    |                  |            |         |                    |
| <a href="#">Jacobsen</a> | 2004  | Denmark |                                                                                                                                                                                                                                                                                                                        | Lung        | TaqMan             | Case-cohort      | Caucasians | 267/269 | Smoking            |
|                          |       |         | <i>XRCC1</i> Cod.399<br><i>XPB/ERCC2</i> Cod.751<br><i>XPB/ERCC2</i> Cod.312<br><i>XRCC3</i> Cod.241<br><i>XPA</i> 5' NCR<br><i>APEX</i> Cod. 148                                                                                                                                                                      |             |                    |                  |            |         |                    |
| <a href="#">Popanda</a>  | 2004  | Germany |                                                                                                                                                                                                                                                                                                                        | Lung        | PCR-RFLP           | H-B case control | Caucasians | 463/460 | Smoking            |
|                          |       |         | <i>XRCC1</i> Cod.399<br><i>XPB/ERCC2</i> Cod.751<br><i>XRCC3</i> Cod.241<br><i>CCND1</i> Cod.870<br><i>XPB</i> Cod. 1104<br><i>NQO1</i> Exon 6<br><i>NBS1</i> Cod. 185<br><i>XPC</i> exon 4<br><i>MTHFR</i> exon 4<br><i>MTHFR</i> exon 7<br><i>NQO1</i> exon 4<br><i>H-ras</i> exon 1<br><i>GSTT1</i> Deletion allele |             | TaqMan<br>PCR-RFLP |                  |            |         |                    |
| <a href="#">Sanyal</a>   | 2004  | Sweden  |                                                                                                                                                                                                                                                                                                                        | Bladder     |                    | H-B case control | Caucasians | 327/246 | NULL               |
| <a href="#">Shen</a>     | 2004  | China   | <i>XRCC3</i> Cod.241                                                                                                                                                                                                                                                                                                   | Gastric     | PCR-RFLP           | P-B case control | Asians     | 188/166 | Smoking<br>Alcohol |
| <a href="#">Wang</a>     | 2004  | USA     | <i>XRCC1</i> Cod.399<br><i>XRCC3</i> Cod.241                                                                                                                                                                                                                                                                           | Glioma      | PCR-RFLP           | H-B case control | Caucasians | 309/342 | NULL               |

|                     |      |        |                                                                          |            |          |                  |        |         |      |
|---------------------|------|--------|--------------------------------------------------------------------------|------------|----------|------------------|--------|---------|------|
|                     |      |        | <i>TP53</i> Cod.72<br><i>RAD51</i> 5' UTR<br><i>XRCC7</i> G6721T         |            |          |                  |        |         |      |
| <a href="#">Yeh</a> | 2005 | Taiwan | <i>XRCC1</i> Cod.399<br><i>XPB/ERCC2</i> Cod.751<br><i>XRCC3</i> Cod.241 | Colorectal | PCR-RFLP | H-B case control | Asians | 727/736 | NULL |

**Table 4. Results: *XPD/ERCC2***

**Cod.156 Skin**

|                             |                              | CA vs CC    |             |             |         | AA vs CC    |             |             |         | CA + AA vs CC |             |             |         |
|-----------------------------|------------------------------|-------------|-------------|-------------|---------|-------------|-------------|-------------|---------|---------------|-------------|-------------|---------|
|                             |                              | OR          | 0.95        | CI          | weights | OR          | 0.95        | CI          | weights | OR            | 0.95        | CI          | weights |
| Adjusted OR                 | Dybdahl 1999 Caucasians      | 3.26        | 0.66        | 16.07       | 1.51    | 5.33        | 0.78        | 36.37       | 1.04    |               |             |             |         |
| Fixed effects meta-analysis | Vogel 2001 Caucasians        | 2.01        | 0.98        | 4.13        | 7.43    | 1.67        | 0.69        | 4.04        | 4.92    |               |             |             |         |
|                             | <b>Summary</b>               | <b>2.18</b> | <b>1.13</b> | <b>4.20</b> |         | <b>2.05</b> | <b>0.92</b> | <b>4.56</b> |         |               |             |             |         |
|                             | <i>Heterogeneity test X=</i> | <i>0.29</i> |             |             |         | <i>1.16</i> |             |             |         |               |             |             |         |
|                             | <i>p-value=</i>              | <i>0.59</i> |             |             |         | <i>0.28</i> |             |             |         |               |             |             |         |
|                             |                              |             |             |             |         |             |             |             |         |               |             |             |         |
| Crude OR                    | Dybdahl 1999 Caucasians      | 3.26        | 0.66        | 16.03       | 1.51    | 5.33        | 0.78        | 36.33       | 1.04    | 3.78          | 0.83        | 17.25       | 1.67    |
| Fixed effects meta-analysis | Vogel 2001 Caucasians        | 2.01        | 0.98        | 4.14        | 7.39    | 1.67        | 0.69        | 4.04        | 4.92    | 1.90          | 0.96        | 3.76        | 8.28    |
|                             | Winsey 2000 Caucasians       | 0.92        | 0.57        | 1.49        | 16.41   | 0.88        | 0.42        | 1.84        | 7.11    | 0.91          | 0.57        | 1.46        | 17.71   |
|                             | <b>Summary</b>               | <b>1.26</b> | <b>0.86</b> | <b>1.85</b> |         | <b>1.30</b> | <b>0.77</b> | <b>2.21</b> |         | <b>1.26</b>   | <b>0.87</b> | <b>1.81</b> |         |
|                             | <i>Heterogeneity test X=</i> | <i>4.59</i> |             |             |         | <i>3.45</i> |             |             |         | <i>5.24</i>   |             |             |         |
|                             | <i>p-value=</i>              | <i>0.10</i> |             |             |         | <i>0.18</i> |             |             |         | <i>0.07</i>   |             |             |         |

**Cod.312 Breast**

|                              |                              | GA vs GG        |             |             |         | AA vs GG    |             |             |         | GA + AA vs GG   |             |             |         |
|------------------------------|------------------------------|-----------------|-------------|-------------|---------|-------------|-------------|-------------|---------|-----------------|-------------|-------------|---------|
|                              |                              | OR              | 0.95        | CI          | weights | OR          | 0.95        | CI          | weights | OR              | 0.95        | CI          | weights |
| Adjusted OR                  | Justenhoven 2004 Caucasians  |                 |             |             |         | 0.49        | 0.33        | 0.72        | 24.47   |                 |             |             |         |
| Random effects meta-analysis | Shi 2004 Caucasians          |                 |             |             |         | 2.06        | 0.63        | 6.71        | 2.75    | 2.01            | 1.03        | 3.93        | 8.54    |
|                              | Tang 2002 Undefined          |                 |             |             |         |             |             |             |         | 1.58            | 0.85        | 2.94        | 9.92    |
|                              | <b>Summary</b>               |                 |             |             |         | <b>0.89</b> | <b>0.22</b> | <b>3.63</b> |         | <b>1.77</b>     | <b>1.12</b> | <b>2.79</b> |         |
|                              | <i>Heterogeneity test X=</i> |                 |             |             |         | <i>5.17</i> |             |             |         | <i>0.27</i>     |             |             |         |
|                              | <i>p-value=</i>              |                 |             |             |         | <i>0.02</i> |             |             |         | <i>0.61</i>     |             |             |         |
|                              |                              |                 |             |             |         |             |             |             |         |                 |             |             |         |
| Crude OR                     | Justenhoven 2004 Caucasians  | 0.54            | 0.42        | 0.70        | 62.00   | 0.45        | 0.30        | 0.67        | 24.14   | 0.52            | 0.41        | 0.66        | 71.18   |
| Random effects meta-analysis | Shi 2004 Caucasians          | 1.88            | 0.94        | 3.75        | 8.03    | 2.11        | 0.67        | 6.72        | 2.87    | 1.92            | 1.00        | 3.70        | 8.97    |
|                              | Tang 2002 Undefined          | 1.58            | 0.85        | 2.93        | 9.93    | 1.00        | 0.36        | 2.79        | 3.63    | 1.42            | 0.80        | 2.52        | 11.71   |
|                              | <b>Summary</b>               | <b>1.12</b>     | <b>0.46</b> | <b>2.74</b> |         | <b>0.87</b> | <b>0.34</b> | <b>2.23</b> |         | <b>1.08</b>     | <b>0.44</b> | <b>2.65</b> |         |
|                              | <i>Heterogeneity test X=</i> | <i>18.29</i>    |             |             |         | <i>7.39</i> |             |             |         | <i>21.01</i>    |             |             |         |
|                              | <i>p-value=</i>              | <i>&lt;0.01</i> |             |             |         | <i>0.02</i> |             |             |         | <i>&lt;0.01</i> |             |             |         |

**Cod.312 Lung**

|  |  | GA vs GG |      |    |         | AA vs GG |      |    |         | GA + AA vs GG |      |    |         |
|--|--|----------|------|----|---------|----------|------|----|---------|---------------|------|----|---------|
|  |  | OR       | 0.95 | CI | weights | OR       | 0.95 | CI | weights | OR            | 0.95 | CI | weights |

|                             |                              |             |             |             |       |             |             |             |       |
|-----------------------------|------------------------------|-------------|-------------|-------------|-------|-------------|-------------|-------------|-------|
| Adjusted OR                 | Liang 2003 Asians            | 1.03        | 0.80        | 1.32        | 61.82 | 10.33       | 1.29        | 82.61       | 0.89  |
| Fixed effects meta-analysis | Misra 2003 Caucasians        | 0.72        | 0.50        | 1.04        | 28.65 | 0.93        | 0.55        | 1.58        | 13.80 |
|                             | Popanda 2004 Undefined       | 1.14        | 0.83        | 1.56        | 39.39 | 1.05        | 0.68        | 1.62        | 20.69 |
|                             | Spitz 2001 Caucasians        | 0.93        | 0.63        | 1.38        | 24.54 | 1.51        | 0.76        | 3.00        | 8.15  |
|                             | Zhou 2002 Caucasians         | 0.98        | 0.80        | 1.20        | 93.47 | 1.41        | 1.10        | 1.80        | 63.36 |
|                             | Butkiewicz 2001 Caucasians   |             |             |             |       | 0.72        | 0.32        | 1.64        | 5.68  |
|                             | <b>Summary</b>               | <b>0.98</b> | <b>0.86</b> | <b>1.11</b> |       | <b>1.25</b> | <b>1.04</b> | <b>1.51</b> |       |
|                             | <i>Heterogeneity test X=</i> | <i>3.84</i> |             |             |       | <i>8.74</i> |             |             |       |
|                             | <i>p-value=</i>              | <i>0.43</i> |             |             |       | <i>0.12</i> |             |             |       |

|                             |                              |             |             |             |        |              |             |             |       |             |             |             |        |
|-----------------------------|------------------------------|-------------|-------------|-------------|--------|--------------|-------------|-------------|-------|-------------|-------------|-------------|--------|
| Crude OR                    | Butkiewicz 2001 Caucasians   | 0.50        | 0.26        | 0.94        | 9.47   | 0.74         | 0.33        | 1.66        | 5.85  | 0.56        | 0.31        | 1.01        | 11.04  |
| Fixed effects meta-analysis | Liang 2003 Asians            | 0.98        | 0.76        | 1.28        | 55.66  | 11.24        | 1.45        | 87.25       | 0.91  | 1.06        | 0.82        | 1.37        | 57.93  |
|                             | Misra 2003 Caucasians        | 0.74        | 0.53        | 1.04        | 33.87  | 0.93         | 0.57        | 1.52        | 16.14 | 0.78        | 0.57        | 1.07        | 38.45  |
|                             | Popanda 2004 Undefined       | 1.15        | 0.87        | 1.52        | 48.90  | 1.07         | 0.72        | 1.58        | 25.19 | 1.13        | 0.87        | 1.46        | 55.56  |
|                             | Spitz 2001 Caucasians        | 0.92        | 0.67        | 1.25        | 38.92  | 1.57         | 0.91        | 2.72        | 12.83 | 1.01        | 0.75        | 1.36        | 43.68  |
|                             | Zhou 2002 Caucasians         | 1.00        | 0.84        | 1.19        | 127.42 | 1.47         | 1.12        | 1.92        | 53.73 | 1.08        | 0.92        | 1.28        | 142.23 |
|                             | <b>Summary</b>               | <b>0.96</b> | <b>0.86</b> | <b>1.07</b> |        | <b>1.30</b>  | <b>1.08</b> | <b>1.55</b> |       | <b>1.02</b> | <b>0.92</b> | <b>1.13</b> |        |
|                             | <i>Heterogeneity test X=</i> | <i>8.26</i> |             |             |        | <i>10.13</i> |             |             |       | <i>7.87</i> |             |             |        |
|                             | <i>p-value=</i>              | <i>0.14</i> |             |             |        | <i>0.07</i>  |             |             |       | <i>0.16</i> |             |             |        |

### Cod.312 Skin

|             |                              | GA vs GG    |             |             |         | AA vs GG    |             |             |         | GA + AA vs GG |             |             |         |
|-------------|------------------------------|-------------|-------------|-------------|---------|-------------|-------------|-------------|---------|---------------|-------------|-------------|---------|
|             |                              | OR          | 0.95        | CI          | weights | OR          | 0.95        | CI          | weights | OR            | 0.95        | CI          | weights |
| Adjusted OR | Baccarelli 2004 Caucasians   |             |             |             |         |             |             |             |         | 1.50          | 0.90        | 2.50        | 14.72   |
|             | Vogel 2001 Caucasians        |             |             |             |         |             |             |             |         | 1.05          | 0.57        | 1.94        | 10.24   |
|             | <b>Summary</b>               |             |             |             |         |             |             |             |         | <b>1.30</b>   | <b>0.88</b> | <b>1.92</b> |         |
|             | <i>Heterogeneity test X=</i> |             |             |             |         |             |             |             |         | <i>0.77</i>   |             |             |         |
|             | <i>p-value=</i>              |             |             |             |         |             |             |             |         | <i>0.38</i>   |             |             |         |
| Crude OR    | Baccarelli 2004 Caucasians   | 1.20        | 0.75        | 1.92        | 17.23   | 0.85        | 0.42        | 1.74        | 7.50    | 1.12          | 0.71        | 1.77        | 18.53   |
|             | Vogel 2001 Caucasians        | 1.02        | 0.51        | 2.02        | 8.21    | 1.11        | 0.49        | 2.54        | 5.63    | 1.05          | 0.57        | 1.94        | 10.12   |
|             | Winsey 2000 Caucasians       | 1.03        | 0.64        | 1.67        | 16.48   | 1.48        | 0.76        | 2.87        | 8.76    | 1.13          | 0.72        | 1.78        | 18.87   |
|             | <b>Summary</b>               | <b>1.09</b> | <b>0.81</b> | <b>1.48</b> |         | <b>1.13</b> | <b>0.75</b> | <b>1.72</b> |         | <b>1.11</b>   | <b>0.84</b> | <b>1.48</b> |         |
|             | <i>Heterogeneity test X=</i> | <i>0.24</i> |             |             |         | <i>1.24</i> |             |             |         | <i>0.04</i>   |             |             |         |
|             | <i>p-value=</i>              | <i>0.89</i> |             |             |         | <i>0.54</i> |             |             |         | <i>0.98</i>   |             |             |         |

### Cod.751 Bladder

|             |                        | CA vs AA |      |      |         | CC vs AA |      |      |         | CA + CC vs AA |      |    |         |
|-------------|------------------------|----------|------|------|---------|----------|------|------|---------|---------------|------|----|---------|
|             |                        | OR       | 0.95 | CI   | weights | OR       | 0.95 | CI   | weights | OR            | 0.95 | CI | weights |
| Adjusted OR | Sanyal 2004 Caucasians | 1.07     | 0.73 | 1.57 | 26.20   | 1.31     | 0.77 | 2.22 | 13.71   |               |      |    |         |

|                             |                              |             |             |             |       |             |             |             |       |             |             |             |       |
|-----------------------------|------------------------------|-------------|-------------|-------------|-------|-------------|-------------|-------------|-------|-------------|-------------|-------------|-------|
| Fixed effects meta-analysis | Shen 2003 Caucasians         | 0.89        | 0.58        | 1.36        | 21.16 | 1.00        | 0.57        | 1.75        | 12.21 | 0.92        | 0.62        | 1.37        | 24.45 |
|                             | Stern 2002b Caucasians       | 1.10        | 0.73        | 1.66        | 22.49 | 0.80        | 0.41        | 1.55        | 8.80  |             |             |             |       |
|                             | Matullo 2001 Caucasians      |             |             |             |       |             |             |             |       | 0.71        | 0.32        | 1.58        | 6.03  |
|                             | <b>Summary</b>               | <b>1.02</b> | <b>0.81</b> | <b>1.29</b> |       | <b>1.05</b> | <b>0.75</b> | <b>1.47</b> |       | <b>0.87</b> | <b>0.61</b> | <b>1.25</b> |       |
|                             | <i>Heterogeneity test X=</i> | <i>0.58</i> |             |             |       | <i>1.35</i> |             |             |       | <i>0.32</i> |             |             |       |
|                             | <i>p-value=</i>              | <i>0.75</i> |             |             |       | <i>0.51</i> |             |             |       | <i>0.57</i> |             |             |       |
| Crude OR                    | Matullo 2001 Caucasians      | 0.76        | 0.40        | 1.43        | 9.40  | 0.75        | 0.31        | 1.77        | 5.14  | 0.75        | 0.41        | 1.39        | 10.17 |
| Fixed effects meta-analysis | Sanyal 2004 Caucasians       | 1.08        | 0.75        | 1.56        | 28.27 | 1.29        | 0.78        | 2.12        | 15.47 | 1.13        | 0.80        | 1.60        | 32.06 |
|                             | Shen 2003 Caucasians         | 0.89        | 0.58        | 1.36        | 21.14 | 1.01        | 0.58        | 1.77        | 12.34 | 0.92        | 0.62        | 1.37        | 24.31 |
|                             | Stern 2002b Caucasians       | 1.05        | 0.69        | 1.59        | 21.79 | 0.85        | 0.46        | 1.55        | 10.53 | 1.00        | 0.67        | 1.48        | 24.45 |
|                             | <b>Summary</b>               | <b>0.98</b> | <b>0.78</b> | <b>1.21</b> |       | <b>1.02</b> | <b>0.76</b> | <b>1.37</b> |       | <b>0.99</b> | <b>0.80</b> | <b>1.21</b> |       |
|                             | <i>Heterogeneity test X=</i> | <i>1.19</i> |             |             |       | <i>1.70</i> |             |             |       | <i>1.44</i> |             |             |       |
|                             | <i>p-value=</i>              | <i>0.76</i> |             |             |       | <i>0.64</i> |             |             |       | <i>0.70</i> |             |             |       |

#### Cod.751 Breast

|                             |                              | CA vs AA    |             |             |         | CC vs AA    |             |             |         | CA + CC vs AA   |             |             |         |
|-----------------------------|------------------------------|-------------|-------------|-------------|---------|-------------|-------------|-------------|---------|-----------------|-------------|-------------|---------|
|                             |                              | OR          | 0.95        | CI          | weights | OR          | 0.95        | CI          | weights | OR              | 0.95        | CI          | weights |
| Adjusted OR                 | Justenhoven 2004 Caucasians  | 1.09        | 0.85        | 1.39        | 63.53   | 1.32        | 0.94        | 1.86        | 32.99   |                 |             |             |         |
| Fixed effects meta-analysis | Shi 2004 Caucasians          | 1.41        | 0.71        | 2.82        | 8.00    | 1.49        | 0.46        | 4.84        | 2.76    | 1.19            | 0.62        | 2.30        | 8.82    |
|                             | Tang 2002 Undefined          | 1.03        | 0.58        | 1.84        | 11.32   | 1.02        | 0.45        | 2.30        | 5.80    |                 |             |             |         |
|                             | Terry 2005 Undefined         | 1.22        | 1.01        | 1.47        | 113.17  | 1.18        | 0.91        | 1.53        | 56.92   | 1.21            | 1.01        | 1.44        | 122.14  |
|                             | <b>Summary</b>               | <b>1.17</b> | <b>1.02</b> | <b>1.35</b> |         | <b>1.22</b> | <b>1.00</b> | <b>1.49</b> |         | <b>1.21</b>     | <b>1.02</b> | <b>1.43</b> |         |
|                             | <i>Heterogeneity test X=</i> | <i>0.98</i> |             |             |         | <i>0.56</i> |             |             |         | <i>&lt;0.01</i> |             |             |         |
|                             | <i>p-value=</i>              | <i>0.81</i> |             |             |         | <i>0.90</i> |             |             |         | <i>0.96</i>     |             |             |         |
| Crude OR                    | Justenhoven 2004 Caucasians  | 1.08        | 0.85        | 1.38        | 64.43   | 1.32        | 0.94        | 1.84        | 34.03   | 1.14            | 0.90        | 1.43        | 73.22   |
| Fixed effects meta-analysis | Shi 2004 Caucasians          | 1.12        | 0.57        | 2.22        | 8.30    | 1.69        | 0.53        | 5.40        | 2.85    | 1.20            | 0.63        | 2.31        | 9.12    |
|                             | Tang 2002 Undefined          | 1.10        | 0.62        | 1.95        | 11.59   | 0.91        | 0.43        | 1.96        | 6.63    | 1.04            | 0.61        | 1.76        | 13.72   |
|                             | Terry 2005 Undefined         | 1.20        | 1.00        | 1.44        | 114.39  | 1.18        | 0.91        | 1.54        | 55.73   | 1.20            | 1.01        | 1.42        | 127.76  |
|                             | <b>Summary</b>               | <b>1.15</b> | <b>1.00</b> | <b>1.32</b> |         | <b>1.22</b> | <b>1.00</b> | <b>1.48</b> |         | <b>1.17</b>     | <b>1.02</b> | <b>1.33</b> |         |
|                             | <i>Heterogeneity test X=</i> | <i>0.50</i> |             |             |         | <i>1.10</i> |             |             |         | <i>0.33</i>     |             |             |         |
|                             | <i>p-value=</i>              | <i>0.92</i> |             |             |         | <i>0.78</i> |             |             |         | <i>0.95</i>     |             |             |         |

#### Cod.751 Esophageal Squamous cell carcinoma

|  |  | CA vs AA |      |    |         | CC vs AA |      |    |         | CA + CC vs AA |      |    |         |
|--|--|----------|------|----|---------|----------|------|----|---------|---------------|------|----|---------|
|  |  | OR       | 0.95 | CI | weights | OR       | 0.95 | CI | weights | OR            | 0.95 | CI | weights |

|                             |                              |             |             |             |       |             |             |              |      |             |             |             |       |
|-----------------------------|------------------------------|-------------|-------------|-------------|-------|-------------|-------------|--------------|------|-------------|-------------|-------------|-------|
| Crude OR                    | Xing 2002a Asians            | 1.11        | 0.77        | 1.60        | 28.49 | 1.23        | 0.25        | 6.12         | 1.49 | 1.11        | 0.77        | 1.59        | 29.59 |
| Fixed effects meta-analysis | Yu 2004 Asians               | 1.09        | 0.52        | 2.28        | 7.03  | 7.39        | 1.62        | 33.73        | 1.67 | 1.75        | 0.92        | 3.32        | 9.39  |
|                             | <b>Summary</b>               | <b>1.10</b> | <b>0.79</b> | <b>1.53</b> |       | <b>3.62</b> | <b>1.30</b> | <b>10.06</b> |      | <b>1.24</b> | <b>0.91</b> | <b>1.70</b> |       |
|                             | <i>Heterogeneity test X=</i> | <0.01       |             |             |       | 2.59        |             |              |      | 1.47        |             |             |       |
|                             | <i>p-value=</i>              | 0.97        |             |             |       | 0.11        |             |              |      | 0.23        |             |             |       |

#### Cod.751 Leukemia

|                             |                              | CA vs AA    |             |             |         | CC vs AA    |             |             |         | CA + CC vs AA |             |             |         |
|-----------------------------|------------------------------|-------------|-------------|-------------|---------|-------------|-------------|-------------|---------|---------------|-------------|-------------|---------|
|                             |                              | OR          | 0.95        | CI          | weights | OR          | 0.95        | CI          | weights | OR            | 0.95        | CI          | weights |
| Adjusted OR                 | Allan 2004 Caucasians        | 1.20        | 0.91        | 1.58        | 51.66   | 1.22        | 0.84        | 1.78        | 27.25   |               |             |             |         |
| Fixed effects meta-analysis | Seedhouse 2002 Caucasians    | 0.74        | 0.31        | 1.77        | 5.06    | 0.61        | 0.18        | 2.05        | 2.61    |               |             |             |         |
|                             | <b>Summary</b>               | <b>1.15</b> | <b>0.89</b> | <b>1.49</b> |         | <b>1.15</b> | <b>0.80</b> | <b>1.64</b> |         |               |             |             |         |
|                             | <i>Heterogeneity test X=</i> | 1.08        |             |             |         | 1.14        |             |             |         |               |             |             |         |
|                             | <i>p-value=</i>              | 0.30        |             |             |         | 0.28        |             |             |         |               |             |             |         |
| Crude OR                    | Allan 2004 Caucasians        | 1.18        | 0.91        | 1.53        | 55.88   | 1.18        | 0.82        | 1.68        | 29.75   | 1.18          | 0.92        | 1.51        | 63.56   |
| Fixed effects meta-analysis | Seedhouse 2002 Caucasians    | 1.20        | 0.63        | 2.28        | 9.16    | 1.09        | 0.44        | 2.69        | 4.72    | 1.17          | 0.64        | 2.15        | 10.36   |
|                             | <b>Summary</b>               | <b>1.18</b> | <b>0.93</b> | <b>1.51</b> |         | <b>1.16</b> | <b>0.83</b> | <b>1.62</b> |         | <b>1.18</b>   | <b>0.94</b> | <b>1.48</b> |         |
|                             | <i>Heterogeneity test X=</i> | <0.01       |             |             |         | 0.02        |             |             |         | <0.01         |             |             |         |
|                             | <i>p-value=</i>              | 0.97        |             |             |         | 0.88        |             |             |         | 0.98          |             |             |         |

#### Cod.751 Lung

|                             |                                     | CA vs AA    |             |             |         | CC vs AA    |             |             |         | CA + CC vs AA |             |             |         |
|-----------------------------|-------------------------------------|-------------|-------------|-------------|---------|-------------|-------------|-------------|---------|---------------|-------------|-------------|---------|
|                             |                                     | OR          | 0.95        | CI          | weights | OR          | 0.95        | CI          | weights | OR            | 0.95        | CI          | weights |
| Adjusted OR                 | David-Beabes 2001 African-Americans | 1.08        | 0.66        | 1.76        | 15.97   | 1.03        | 0.40        | 2.65        | 4.30    | 1.07          | 0.67        | 1.71        | 17.50   |
| Fixed effects meta-analysis | David-Beabes 2001 Caucasians        | 0.97        | 0.62        | 1.52        | 19.11   | 1.34        | 0.74        | 2.42        | 10.95   | 1.06          | 0.70        | 1.61        | 22.15   |
|                             | Harms 2004 Caucasians               | 1.39        | 0.79        | 2.44        | 12.08   | 0.95        | 0.26        | 3.45        | 2.31    | 1.33          | 0.77        | 2.30        | 12.73   |
|                             | Liang 2003 Asians                   | 0.95        | 0.74        | 1.22        | 61.48   | 2.71        | 1.01        | 7.26        | 3.96    |               |             |             |         |
|                             | Misra 2003 Caucasians               | 0.82        | 0.56        | 1.20        | 27.05   | 1.02        | 0.61        | 1.70        | 14.63   | 0.87          | 0.61        | 1.24        | 31.24   |
|                             | Popanda 2004 Undefined              | 1.16        | 0.85        | 1.59        | 39.18   | 1.39        | 0.90        | 2.14        | 20.48   |               |             |             |         |
|                             | Spitz 2001 Caucasians               | 1.07        | 0.78        | 1.47        | 38.26   | 1.36        | 0.84        | 2.20        | 16.58   |               |             |             |         |
|                             | Zhou 2002 Caucasians                | 1.01        | 0.87        | 1.17        | 185.67  | 1.17        | 0.91        | 1.51        | 58.89   |               |             |             |         |
|                             | Xing 2002b Asians                   |             |             |             |         |             |             |             |         | 1.42          | 0.94        | 2.15        | 22.45   |
|                             | <b>Summary</b>                      | <b>1.02</b> | <b>0.92</b> | <b>1.12</b> |         | <b>1.24</b> | <b>1.05</b> | <b>1.47</b> |         | <b>1.09</b>   | <b>0.91</b> | <b>1.32</b> |         |
|                             | <i>Heterogeneity test X=</i>        | 3.60        |             |             |         | 3.96        |             |             |         | 3.68          |             |             |         |
|                             | <i>p-value=</i>                     | 0.82        |             |             |         | 0.78        |             |             |         | 0.45          |             |             |         |

|                             |                                     |             |             |             |        |             |             |             |       |             |             |             |        |
|-----------------------------|-------------------------------------|-------------|-------------|-------------|--------|-------------|-------------|-------------|-------|-------------|-------------|-------------|--------|
| Crude OR                    | David-Beabes 2001 African-Americans | 1.14        | 0.74        | 1.74        | 21.18  | 1.39        | 0.59        | 3.26        | 5.31  | 1.17        | 0.78        | 1.76        | 23.00  |
| Fixed effects meta-analysis | David-Beabes 2001 Caucasians        | 1.14        | 0.78        | 1.68        | 26.29  | 1.72        | 1.04        | 2.86        | 15.00 | 1.27        | 0.89        | 1.82        | 30.38  |
|                             | Harms 2004 Caucasians               | 1.32        | 0.77        | 2.24        | 13.48  | 1.05        | 0.33        | 3.31        | 2.89  | 1.28        | 0.76        | 2.16        | 14.28  |
|                             | Liang 2003 Asians                   | 0.93        | 0.73        | 1.19        | 66.60  | 2.34        | 0.89        | 6.11        | 4.16  | 0.98        | 0.78        | 1.24        | 70.16  |
|                             | Misra 2003 Caucasians               | 0.87        | 0.62        | 1.23        | 32.09  | 1.09        | 0.68        | 1.74        | 17.24 | 0.92        | 0.66        | 1.28        | 35.77  |
|                             | Popanda 2004 Undefined              | 1.14        | 0.86        | 1.51        | 48.39  | 1.36        | 0.92        | 2.01        | 25.37 | 1.19        | 0.91        | 1.55        | 54.78  |
|                             | Spitz 2001 Caucasians               | 1.07        | 0.78        | 1.46        | 38.33  | 1.36        | 0.84        | 2.20        | 16.58 | 1.12        | 0.83        | 1.51        | 42.81  |
|                             | Xing 2002b Asians                   | 1.33        | 0.88        | 2.01        | 22.51  | 1.91        | 0.45        | 8.06        | 1.85  | 1.37        | 0.91        | 2.04        | 23.90  |
|                             | Zhou 2002 Caucasians                | 1.03        | 0.86        | 1.22        | 123.31 | 1.19        | 0.92        | 1.53        | 59.98 | 1.06        | 0.90        | 1.25        | 138.25 |
|                             | <b>Summary</b>                      | <b>1.05</b> | <b>0.95</b> | <b>1.16</b> |        | <b>1.31</b> | <b>1.11</b> | <b>1.54</b> |       | <b>1.10</b> | <b>1.00</b> | <b>1.21</b> |        |
|                             | <i>Heterogeneity test X=</i>        | <i>4.72</i> |             |             |        | <i>4.20</i> |             |             |       | <i>4.78</i> |             |             |        |
|                             | <i>p-value=</i>                     | <i>0.86</i> |             |             |        | <i>0.84</i> |             |             |       | <i>0.85</i> |             |             |        |

#### Cod.751 Skin

|                              |                              | CA vs AA    |             |             |         | CC vs AA    |             |             |         | CA + CC vs AA |             |             |         |
|------------------------------|------------------------------|-------------|-------------|-------------|---------|-------------|-------------|-------------|---------|---------------|-------------|-------------|---------|
|                              |                              | OR          | 0.95        | CI          | weights | OR          | 0.95        | CI          | weights | OR            | 0.95        | CI          | weights |
| Adjusted OR                  | Baccarelli 2004 Caucasians   |             |             |             |         |             |             |             |         | 1.30          | 0.67        | 2.54        | 8.59    |
| Random effects meta-analysis | Dybdahl 1999 Caucasians      |             |             |             |         | 0.23        | 0.04        | 1.26        | 1.33    |               |             |             |         |
|                              | Vogel 2001 Caucasians        |             |             |             |         | 1.83        | 0.71        | 4.70        | 4.31    | 1.18          | 0.64        | 2.18        | 10.15   |
|                              | <b>Summary</b>               |             |             |             |         | <b>0.74</b> | <b>0.10</b> | <b>5.51</b> |         | <b>1.23</b>   | <b>0.78</b> | <b>1.94</b> |         |
|                              | <i>Heterogeneity test X=</i> |             |             |             |         | <i>4.35</i> |             |             |         | <i>0.04</i>   |             |             |         |
|                              | <i>p-value=</i>              |             |             |             |         | <i>0.04</i> |             |             |         | <i>0.83</i>   |             |             |         |
| Crude OR                     | Baccarelli 2004 Caucasians   | 1.12        | 0.71        | 1.79        | 17.67   | 0.74        | 0.39        | 1.40        | 9.42    | 1.02          | 0.65        | 1.58        | 19.55   |
| Fixed effects meta-analysis  | Dybdahl 1999 Caucasians      | 0.90        | 0.24        | 3.41        | 2.17    | 0.20        | 0.02        | 2.16        | 0.68    | 0.67          | 0.19        | 2.33        | 2.45    |
|                              | Vogel 2001 Caucasians        | 1.05        | 0.55        | 2.01        | 9.14    | 1.83        | 0.71        | 4.70        | 4.33    | 1.18          | 0.64        | 2.19        | 10.06   |
|                              | Winsey 2000 Caucasians       | 0.75        | 0.46        | 1.22        | 16.00   | 1.13        | 0.59        | 2.14        | 9.29    | 0.84          | 0.53        | 1.32        | 18.29   |
|                              | <b>Summary</b>               | <b>0.95</b> | <b>0.71</b> | <b>1.27</b> |         | <b>0.98</b> | <b>0.66</b> | <b>1.45</b> |         | <b>0.96</b>   | <b>0.73</b> | <b>1.26</b> |         |
|                              | <i>Heterogeneity test X=</i> | <i>1.50</i> |             |             |         | <i>4.33</i> |             |             |         | <i>1.17</i>   |             |             |         |
|                              | <i>p-value=</i>              | <i>0.68</i> |             |             |         | <i>0.23</i> |             |             |         | <i>0.76</i>   |             |             |         |

**Table 5. Results: XRCC3**

**Cod.241 Bladder**

|                                            |                         | CT vs CC    |             |             |         | TT vs CC    |             |             |         | CT + TT vs CC |             |             |         |
|--------------------------------------------|-------------------------|-------------|-------------|-------------|---------|-------------|-------------|-------------|---------|---------------|-------------|-------------|---------|
|                                            |                         | OR          | 0.95        | CI          | weights | OR          | 0.95        | CI          | weights | OR            | 0.95        | CI          | weights |
| Adjusted OR<br>fixed effects meta-analysis | Sanyal 2004 Caucasians  | 0.97        | 0.66        | 1.42        | 26.67   | 1.31        | 0.75        | 2.27        | 12.64   |               |             |             |         |
|                                            | Shen 2003 Caucasians    | 0.60        | 0.40        | 0.90        | 22.74   | 0.74        | 0.39        | 1.39        | 9.62    | 0.63          | 0.42        | 0.94        | 24.32   |
|                                            | Stern 2002b Mixed       | 1.20        | 0.78        | 1.85        | 20.54   | 1.50        | 0.82        | 2.76        | 10.39   |               |             |             |         |
|                                            | Matullo 2001 Caucasians |             |             |             |         |             |             |             |         | 2.72          | 1.37        | 5.42        | 8.10    |
|                                            | <b>Summary</b>          | <b>0.88</b> | <b>0.70</b> | <b>1.12</b> |         | <b>1.16</b> | <b>0.82</b> | <b>1.63</b> |         | <b>1.27</b>   | <b>0.30</b> | <b>5.33</b> |         |
| <i>Heterogeneity test X=</i>               |                         | 5.56        |             |             |         | 2.82        |             |             |         | 13.00         |             |             |         |
| <i>p-value=</i>                            |                         | 0.06        |             |             |         | 0.24        |             |             |         | <0.01         |             |             |         |
| Crude OR<br>Random effects meta-analysis   | Matullo 2001 Caucasians | 3.50        | 1.81        | 6.75        | 8.90    | 1.77        | 0.85        | 3.71        | 7.04    | 2.71          | 1.51        | 4.87        | 11.26   |
|                                            | Sanyal 2004 Caucasians  | 0.93        | 0.64        | 1.33        | 29.37   | 1.42        | 0.85        | 2.38        | 14.51   | 1.03          | 0.74        | 1.45        | 33.76   |
|                                            | Shen 2003 Caucasians    | 0.60        | 0.39        | 0.91        | 21.88   | 0.69        | 0.37        | 1.30        | 9.72    | 0.62          | 0.41        | 0.92        | 24.11   |
|                                            | Stern 2002b Mixed       | 1.24        | 0.83        | 1.84        | 24.05   | 1.48        | 0.81        | 2.72        | 10.48   | 1.28          | 0.88        | 1.88        | 26.80   |
|                                            | <b>Summary</b>          | <b>1.19</b> | <b>0.66</b> | <b>2.12</b> |         | <b>1.26</b> | <b>0.93</b> | <b>1.70</b> |         | <b>1.18</b>   | <b>0.71</b> | <b>1.95</b> |         |
| <i>Heterogeneity test X=</i>               |                         | 20.91       |             |             |         | 4.81        |             |             |         | 18.02         |             |             |         |
| <i>p-value=</i>                            |                         | <0.01       |             |             |         | 0.19        |             |             |         | <0.01         |             |             |         |

**Cod.241 Breast**

|                                            |                           | CT vs CC    |             |             |         | TT vs CC    |             |             |         | CT + TT vs CC |             |             |         |
|--------------------------------------------|---------------------------|-------------|-------------|-------------|---------|-------------|-------------|-------------|---------|---------------|-------------|-------------|---------|
|                                            |                           | OR          | 0.95        | CI          | weights | OR          | 0.95        | CI          | weights | OR            | 0.95        | CI          | weights |
| Adjusted OR<br>fixed effects meta-analysis | Figueiredo 2004 Undefined | 0.96        | 0.70        | 1.31        | 39.96   | 1.44        | 0.94        | 2.20        | 21.48   |               |             |             |         |
|                                            | Han 2004a Undefined       | 0.87        | 0.72        | 1.05        | 107.95  | 0.98        | 0.75        | 1.28        | 53.78   |               |             |             |         |
|                                            | Jacobsen 2003 Caucasians  | 1.01        | 0.75        | 1.36        | 44.48   | 0.89        | 0.59        | 1.35        | 22.43   |               |             |             |         |
|                                            | <b>Summary</b>            | <b>0.92</b> | <b>0.80</b> | <b>1.06</b> |         | <b>1.04</b> | <b>0.86</b> | <b>1.27</b> |         |               |             |             |         |
| <i>Heterogeneity test X=</i>               |                           | 0.80        |             |             |         | 3.01        |             |             |         |               |             |             |         |
| <i>p-value=</i>                            |                           | 0.67        |             |             |         | 0.22        |             |             |         |               |             |             |         |
| Crude OR<br>Fixed effects meta-analysis    | Figueiredo 2004 Undefined | 0.98        | 0.72        | 1.33        | 40.95   | 1.44        | 0.95        | 2.19        | 22.28   | 1.08          | 0.81        | 1.44        | 45.97   |
|                                            | Han 2004a Undefined       | 0.85        | 0.71        | 1.02        | 115.55  | 1.00        | 0.76        | 1.30        | 54.44   | 0.88          | 0.74        | 1.05        | 128.93  |
|                                            | Jacobsen 2003 Caucasians  | 1.01        | 0.75        | 1.35        | 44.72   | 0.89        | 0.59        | 1.35        | 22.36   | 0.98          | 0.74        | 1.29        | 49.99   |
|                                            | Smith 2003b Caucasians    | 0.88        | 0.60        | 1.29        | 26.80   | 1.84        | 1.08        | 3.13        | 13.70   | 1.06          | 0.75        | 1.52        | 30.55   |
|                                            | Smith 2003a Mixed         | 0.95        | 0.62        | 1.44        | 21.90   | 0.96        | 0.54        | 1.69        | 11.92   | 0.95          | 0.64        | 1.41        | 24.80   |
| <b>Summary</b>                             |                           | <b>0.91</b> | <b>0.80</b> | <b>1.03</b> |         | <b>1.11</b> | <b>0.94</b> | <b>1.33</b> |         | <b>0.95</b>   | <b>0.85</b> | <b>1.07</b> |         |
| <i>Heterogeneity test X=</i>               |                           | 1.24        |             |             |         | 7.04        |             |             |         | 1.89          |             |             |         |
| <i>p-value=</i>                            |                           | 0.87        |             |             |         | 0.13        |             |             |         | 0.76          |             |             |         |



## Cod.241 Lung

|                                            |                                     | CT vs CC    |             |             |         | TT vs CC    |             |             |         | CT + TT vs CC |             |             |         |
|--------------------------------------------|-------------------------------------|-------------|-------------|-------------|---------|-------------|-------------|-------------|---------|---------------|-------------|-------------|---------|
|                                            |                                     | OR          | 0.95        | CI          | weights | OR          | 0.95        | CI          | weights | OR            | 0.95        | CI          | weights |
| Adjusted OR<br>fixed effects meta-analysis | David-Beabes 2001 African-Americans | 0.90        | 0.55        | 1.48        | 15.68   | 1.67        | 0.57        | 4.88        | 3.34    | 0.98          | 0.61        | 1.57        | 17.43   |
|                                            | David-Beabes 2001 Caucasians        | 0.93        | 0.60        | 1.44        | 20.37   | 0.94        | 0.50        | 1.75        | 9.92    | 0.93          | 0.62        | 1.40        | 22.76   |
|                                            | Harms 2004 Caucasians               | 0.66        | 0.36        | 1.19        | 10.90   | 1.25        | 0.47        | 3.32        | 4.02    | 0.75          | 0.43        | 1.30        | 12.55   |
|                                            | Jacobsen 2004 Caucasians            | 1.54        | 1.05        | 2.26        | 26.15   | 1.46        | 0.87        | 2.46        | 14.11   |               |             |             |         |
|                                            | Misra 2003 Caucasians               | 0.96        | 0.69        | 1.34        | 34.88   | 1.12        | 0.59        | 2.12        | 9.39    | 1.14          | 0.62        | 2.11        | 10.17   |
|                                            | Popanda 2004 Undefined              | 0.95        | 0.69        | 1.31        | 37.39   | 1.29        | 0.85        | 1.97        | 21.49   |               |             |             |         |
|                                            | <b>Summary</b>                      | <b>1.00</b> | <b>0.85</b> | <b>1.18</b> |         | <b>1.25</b> | <b>0.97</b> | <b>1.60</b> |         | <b>0.93</b>   | <b>0.73</b> | <b>1.20</b> |         |
|                                            | <i>Heterogeneity test X=</i>        | 7.19        |             |             |         | 1.56        |             |             |         | 1.05          |             |             |         |
|                                            | <i>p-value=</i>                     | 0.21        |             |             |         | 0.91        |             |             |         | 0.79          |             |             |         |
| Crude OR<br>Fixed effects meta-analysis    | David-Beabes 2001 African-Americans | 0.93        | 0.60        | 1.43        | 20.68   | 1.36        | 0.53        | 3.48        | 4.36    | 0.97          | 0.64        | 1.47        | 22.45   |
|                                            | David-Beabes 2001 Caucasians        | 0.86        | 0.59        | 1.24        | 27.43   | 0.81        | 0.47        | 1.39        | 13.29   | 0.84          | 0.59        | 1.20        | 30.99   |
|                                            | Harms 2004 Caucasians               | 0.76        | 0.43        | 1.32        | 12.47   | 1.20        | 0.48        | 2.98        | 4.63    | 0.83          | 0.49        | 1.40        | 14.26   |
|                                            | Jacobsen 2004 Caucasians            | 1.29        | 0.89        | 1.88        | 27.51   | 1.05        | 0.63        | 1.76        | 14.5    | 1.51          | 1.06        | 2.16        | 30.10   |
|                                            | Misra 2003 Caucasians               | 0.87        | 0.63        | 1.20        | 35.93   | 1.22        | 0.67        | 2.22        | 10.65   | 0.91          | 0.67        | 1.25        | 39.36   |
|                                            | Popanda 2004 Undefined              | 0.87        | 0.65        | 1.16        | 47.36   | 1.23        | 0.84        | 1.80        | 26.72   | 0.96          | 0.73        | 1.25        | 54.06   |
|                                            | <b>Summary</b>                      | <b>0.92</b> | <b>0.79</b> | <b>1.07</b> |         | <b>1.11</b> | <b>0.88</b> | <b>1.39</b> |         | <b>0.99</b>   | <b>0.86</b> | <b>1.14</b> |         |
|                                            | <i>Heterogeneity test X=</i>        | 4.12        |             |             |         | 1.92        |             |             |         | 6.94          |             |             |         |
|                                            | <i>p-value=</i>                     | 0.53        |             |             |         | 0.86        |             |             |         | 0.23          |             |             |         |

## Cod.241 Skin

|                                          |                              | CT vs CC    |             |             |         | TT vs CC    |             |             |         | CT + TT vs CC |             |             |         |
|------------------------------------------|------------------------------|-------------|-------------|-------------|---------|-------------|-------------|-------------|---------|---------------|-------------|-------------|---------|
|                                          |                              | OR          | 0.95        | CI          | weights | OR          | 0.95        | CI          | weights | OR            | 0.95        | CI          | weights |
| Crude OR<br>Random effects meta-analysis | Bertram 2004 Caucasians      | 1.12        | 0.72        | 1.72        | 20.58   | 1.47        | 0.80        | 2.72        | 10.21   | 1.19          | 0.79        | 1.79        | 22.90   |
|                                          | Duan 2002 Caucasians         | 0.91        | 0.65        | 1.28        | 33.21   | 0.82        | 0.50        | 1.36        | 15.25   | 0.89          | 0.65        | 1.23        | 36.59   |
|                                          | Winsey 2000 Caucasians       | 2.35        | 1.44        | 3.84        | 15.89   | 2.58        | 1.28        | 5.16        | 7.95    | 2.40          | 1.51        | 3.82        | 17.77   |
|                                          | <b>Summary</b>               | <b>1.31</b> | <b>0.77</b> | <b>2.23</b> |         | <b>1.41</b> | <b>0.74</b> | <b>2.71</b> |         | <b>1.34</b>   | <b>0.77</b> | <b>2.33</b> |         |
|                                          | <i>Heterogeneity test X=</i> | 9.77        |             |             |         | 7.06        |             |             |         | 11.73         |             |             |         |
|                                          | <i>p-value=</i>              | 0.01        |             |             |         | 0.03        |             |             |         | <0.01         |             |             |         |
